1 **The impact of diabetes mellitus and HBV infection on major**  
2 **adverse cardiovascular events related to statin use for Chinese**  
3 **population with cardiovascular disease**

4 **Running title:** Effect of DM or HBV infection on MACEs.

5

6 Qian Wu<sup>a</sup>, MM; Xiaoxuan He<sup>a</sup>, MM; Xiaoning Tong<sup>a</sup>, MM; Ying Li<sup>b</sup>,MM; Xiaoqin  
7 Wang<sup>a</sup>, MD

8 <sup>a</sup>Department of Clinical Laboratory, The First Affiliated Hospital of Xi'an Jiaotong  
9 University, Xi'an, 710061, Shaanxi Province, China.

10 <sup>b</sup>Department of Clinical Laboratory, Shaanxi Kang Fu Hospital, Xi'an,710065,  
11 Shaanxi Province, China.

12

13 Qian Wu and Xiaoxuan He contributed equally to this work.

14

15 **Correspondence to:** Dr. Xiaoqin Wang, M.D. Department of Clinical Laboratory,  
16 The First Affiliated Hospital of Xi'an Jiaotong University, No. 277 West Yanta Road,  
17 Xi'an 710061, Shaanxi Province, China. E-mail: wq710641296@xjtufh.edu.cn.

18

19 **Clinical Perspective**

20 **What Is New?**

21 • This study investigates the association between statin therapy and major adverse  
22 cardiovascular events (MACEs) in Chinese patients with cardiovascular disease who  
23 have concurrent hepatitis B virus infection or diabetes mellitus.

24 • The findings suggest potential cardiovascular benefits of statin therapy in this

25 specific patient population.

26 • The study explores the relationship between statin use and changes in hepatic  
27 function, atherosclerotic markers, and inflammatory parameters.

28 **What Are the Clinical Implications?**

29 • The results provide evidence supporting statin use in cardiovascular disease patients  
30 with hepatitis B virus infection or diabetes mellitus.

31 • Glycemic control appears to be an important factor in optimizing cardiovascular  
32 outcomes in these patients.

33 • Regular monitoring of hepatic and inflammatory markers may be valuable in  
34 assessing treatment response.

35 **BACKGROUND:** The association between hepatitis B virus (HBV) infection, diabetes mellitus  
36 (DM) and cardiovascular disease (CVD) remains uncertain. This study was aimed to investigate  
37 the impact of HBV infection and DM on 13 major adverse cardiovascular events (MACEs) among  
38 CVD patients with or without statin use.

39 **METHODS AND RESULTS:** In total, 45,013 individuals participated in the baseline survey  
40 between June 2020 and August 2023. The patients were categorized into two groups according to  
41 their surface antigen status. Finally, a sample size of 496 participants was included in the study:  
42 patients with coexisting CVD and HBV (n = 225) and patients with CVD alone (n = 271).The  
43 implementation of statins has demonstrated the potential to reduce the incidence of coronary heart  
44 disease (CHD) and angina pectoris (AP) in individuals with CVD who are also affected by HBV  
45 infection. The analysis of stratification, taking into account the presence of DM, has demonstrated  
46 a significant increased vulnerability to myocardial infarction (MI), acute myocardial infarction  
47 (AMI), and heart failure (HF) among individuals with HBV infection combined with CVD. DM  
48 and hemoglobin A1c (HBA1c) level of  $\geq 6$  are identified as risk factors for the development of  
49 CHD, MI, AP, and hypertension. Our study also suggests that statin therapy led to a  
50 dose-dependent decrease in liver fibrosis, as well as improvement of the atherogenicity index and  
51 systemic inflammatory response in patients with CVD.

52 **CONCLUSION:** Our study indicates that CVD patients who also have HBV infection or DM  
53 may experience a reduction in MACEs when treated with statins. Furthermore, our research  
54 indicates that focusing on long-term glycemic control is essential in this patient population in  
55 order to enhance cardiovascular outcomes. The observed improvements in hepatic function,  
56 atherosclerotic burden, and systemic inflammation associated with statin therapy may contribute  
57 to the favorable cardiovascular outcomes among individuals with CVD.

58        **Key Words:** HBV ■ diabetes mellitus ■ CHD ■ cardiovascular disease ■ statins use

59        Coronary heart disease (CHD) is the primary cause of mortality in humans,  
60        accounting for approximately 9 million deaths annually worldwide <sup>1</sup>. CHD  
61        encompasses cardiovascular conditions resulting from the narrowing or obstruction of  
62        the coronary arteries due to atherosclerosis, as well as myocardial ischemia, hypoxia,  
63        or necrosis caused by functional alterations in these arteries <sup>2</sup>. Presently, there exists a  
64        prevailing belief within the academic community that the presence of obesity,  
65        smoking, and alcohol consumption plays a substantial role in the advancement of  
66        CHD <sup>3, 4</sup>. Furthermore, it is worth emphasizing that hypertension, hyperlipidemia,  
67        hypercholesterolemia, and diabetes mellitus (DM) also contribute to the development  
68        of CHD <sup>5-8</sup>. Notably, DM represents a significant risk factor, as the elevated blood  
69        glucose levels experienced by individuals with this condition often induce oxidative  
70        stress and inflammatory harm, ultimately resulting in atherosclerosis, coronary artery  
71        dysfunction, myocardial infarction, and cellular impairment, thereby fostering the  
72        progression of CHD <sup>9</sup>. DM is additionally linked to an unfavorable long-term  
73        prognosis in individuals diagnosed with CHD. In comparison to patients without DM,  
74        those with DM complicated by CHD exhibit a higher mortality rate over a span of 10  
75        years <sup>10</sup>.

76        The global prevalence of Hepatitis B virus (HBV) infection is substantial, rendering it  
77        a significant concern for public health. Prolonged HBV infection can result in chronic  
78        hepatitis, cirrhosis, liver decompensation, and hepatocellular carcinoma <sup>11</sup>. Chronic  
79        HBV infection is characterized by a state of inflammation, which has been observed

80 to elevate the likelihood of major adverse cardiovascular events (MACE) and  
81 cerebrovascular disease in other conditions featuring chronic low-grade inflammation  
82 <sup>12, 13</sup>. Several studies have examined the association between HBV infection and  
83 cardiovascular disease (CVD); however, the findings have been inconclusive <sup>14-17</sup>.  
84 Certain studies have identified a positive correlation between HBV infection and  
85 coronary artery disease <sup>17</sup>, whereas others have indicated a negative correlation <sup>14-16</sup>.  
86 In individuals diagnosed with chronic viral hepatitis, it has been observed that those  
87 with HCV infection exhibit a notably elevated susceptibility to composite arterial  
88 events and all-cause mortality when compared to those with HBV infection <sup>18, 19</sup>.  
89 Furthermore, investigations have indicated that there is no substantial association  
90 between the prevalence of macrovascular complications, microvascular complications  
91 of diabetes, diabetic ketosis, or diabetic ketoacidosis and the status of HBV infection  
92 <sup>20</sup>. Hence, it is crucial to persist in the examination of the correlation between HBV  
93 infection and MACE.

94 Statins have demonstrated efficacy in mitigating the occurrence of CVD and are  
95 endorsed as the primary therapeutic approach for hypercholesterolemia in clinical  
96 guidelines <sup>21, 22</sup>. The American College of Cardiology/American Heart Association  
97 guidelines for managing blood cholesterol levels to minimize the risk of  
98 atherosclerotic CVD (ASCVD) in adults have classified statins into low, moderate,  
99 and high potency categories, based on comprehensive analysis of their lipid-lowering  
100 effects across various clinical trials and direct comparisons. High-potency statins,  
101 such as rosuvastatin at doses of 20 mg/d and 40 mg/d, and atorvastatin at doses of 40

102 mg/d and 80 mg/d, have exhibited a noteworthy decrease in low-density lipoprotein  
103 cholesterol (LDL-C) levels surpassing 50% <sup>21</sup>. Additionally, decreased cholesterol  
104 levels by statin use may impact the advancement of hepatic fibrosis by ameliorating  
105 portal hypertension and reducing the excessive accumulation of hepatic triglycerides  
106 <sup>23-25</sup>. Numerous clinical studies have demonstrated the efficacy of statin  
107 administration in patients with NAFLD, leading to improvements in liver  
108 ultrasonography and liver function tests <sup>26-28</sup>. The independent association of statin  
109 use with reductions in hepatic steatosis and fibrosis stage in NAFLD patients has also  
110 been observed <sup>26, 28</sup>. The pathogenesis of hepatic fibrosis is characterized by a  
111 multifaceted interaction between lipid metabolism and systemic chronic inflammatory  
112 response in patients with CVD <sup>29, 30</sup>.

113 Hence, this study aimed to gather data on patients with both HBV and CVD, as well  
114 as those with CVD alone, in order to examine the correlation between statin use and  
115 HBV infection, DM, or hemoglobin A1c (HbA1c) levels among individuals with  
116 CVD. Additionally, the study sought to assess the impact of HBV infection, DM,  
117 HbA1c levels, or statin use on various cardiovascular outcomes in patients with CVD.  
118 Currently, there is uncertainty regarding the impact of statins on hepatic fibrosis and  
119 systemic inflammatory response, as well as their effects on CVD and lipid  
120 metabolism. The identification of specific markers in this context remains ambiguous.  
121 It is our assertion that the identification of suitable markers is crucial for the  
122 monitoring of liver fibrosis and systemic inflammation in patients with CVD  
123 undergoing statin therapy. Our research aimed to assess the impact of statin therapy

124 on hepatic fibrosis, systemic inflammation, and atherogenic indices in patients with  
125 CVD.

126

## 127 **MATERIALS AND METHODS**

### 128 **Study design and participants**

129 A prospective cohort study was conducted to examine the prevalence, incidence, and  
130 associated factors, such as HBV infection, in relation to CVD. The study was  
131 approved by the Ethics Committee of the First Affiliated Hospital of Xi'an Jiaotong  
132 University (No:XJTU1AF2024LSYY-054). In total, 45,013 individuals participated in  
133 the baseline survey at the First Affiliated Hospital of Xi'an Jiaotong University (Xi'an,  
134 China) between June 2020 and August 2023. Of these, 43,750 cases were excluded  
135 due to HCV, HIV, syphilis infection, as well as incomplete basic data of test results  
136 and medical records. A total of 268 patients presenting with hepatic hemangioma,  
137 toxic diffuse goiter with hyperthyroidism, hypothyroidism, endometrial cancer, stage  
138 5 hemodialysis status of chronic kidney disease, chronic renal insufficiency, skull  
139 osteoma, and right lobe cyst of thyroid gland were excluded from the study.  
140 Additionally, 499 cases with incomplete test data, including five quantitative variables  
141 (disease load, blood cells, blood lipid, and other information), as well as incomplete  
142 drug use information, were also excluded. Consequently, a final sample size of 496  
143 participants was included in the study (refer to [Figure 1](#)). The patients were  
144 categorized into two groups according to their surface antigen status: patients with  
145 coexisting CVD and HBV (n = 225) and patients with CVD alone (n = 271). In  
146 addition, a sample size of 494 CVD participants was included, patients with statin use

147 (n = 415) and statin-free (n = 79), to investigate the effect of statin use on hepatic  
148 fibrosis, atherosclerotic burden, and systemic inflammation.

### 149 **Clinical data collection and measurements**

150 The variables considered in this study encompassed patient demographics such as age  
151 and gender, as well as medical factors including hypertension, smoking/alcohol  
152 consumption, diabetes, disease status, biochemical indicators, blood cell indicators,  
153 HBV five-item quantitative, HBV-DNA quantitative, statin use, antiviral therapy for  
154 hepatitis B, and major adverse cardiovascular events. The ratios of platelet count to  
155 lymphocyte count (PLR) and neutrophil count to lymphocyte count (NLR) are  
156 computed to assess certain adverse cardiovascular events, such as recurrent angina  
157 pectoris (AP), hospitalization for unstable angina pectoris (UAP), acute myocardial  
158 infarction (AMI), severe arrhythmia, heart failure (HF), and death due to CHD. Major  
159 adverse cardiovascular events include recurrent AP, UAP requiring hospitalization,  
160 AMI, severe arrhythmia, HF, coronary-related death, etc. Secondary adverse  
161 cardiovascular events include Killip classification II-IV or NYHA Classification  
162 II-IV.

163 All specimens were tested within 2 hours following their collection. In cases where  
164 immediate testing was not feasible, specimens were stored at a temperature of -20°C  
165 for a duration not exceeding 2 days. The fluorescence quantitative PCR detection of  
166 HBV-DNA load was conducted utilizing the 7500 fluorescence quantitative PCR  
167 instrument and associated reagents (ABI, USA). Quantitative determination of  
168 biochemical indicators was performed using the Roche AU5600 automatic



169 biochemical analyzer and its corresponding original reagents. The quantification of  
170 the five components of serum hepatitis B was performed using the i2000sr instrument  
171 manufactured by Abbott Laboratories, USA. The detection of blood cell indicators  
172 was conducted using the routine automatic flow cytometer Mindray CAL8000. The  
173 Roche E801 automatic immunoassay analyzer, along with original reagents, was  
174 utilized for the quantitative determination of B-type natriuretic peptide (BNP) in the  
175 anterior brain. HbA1c was assessed with high-performance liquid chromatography.  
176 All aforementioned measurements were performed in accordance with the  
177 manufacturer's instructions.

178 **Calculations of the albumin-bilirubin index (ALBI) score, fibrosis 4 index (FIB-4)**  
179 **index, complete blood count derived inflammation index (CBCIIs) and**  
180 **atherogenic indices.** Non-invasive and non-destructive testing markers, including  
181 FIB-4, ALBI, and CBCIIs, such as platelet monocyte ratio (PMR),  
182 neutrophil/lymphocyte ratio (NLR), SII, systemic inflammatory response index (SIRI),  
183 and aggregate index of systemic inflammation, and atherogenic indices, such as  
184 atherogenic index of plasma (AIP), atherogenic index (AI), Castelli risk index-I  
185 (CRI-I), Castelli risk index-II (CRI-II), and triglyceride-rich lipoprotein cholesterol  
186 (TRL-C) were used to evaluate the effects of statin use on hepatic fibrosis, systemic  
187 inflammation, and arteriosclerotic degree in patients with CVD. The calculation  
188 formulas of hepatic fibrosis indicators ALBI score, FIB-4 index were measured as  
189 described previously <sup>31</sup>. CBCIIs, including SIRI, SII, aggregate index of systemic  
190 inflammation (AISI), SIRI/HDL-C, and SIRI×LDL-C, were calculated as described

191 previously<sup>32, 33</sup>. Atherogenic indices, such as adjusted AIP, AIP, AI, CRI-I, CRI-II,  
192 LCI, and TRL-C, were calculated as described previously<sup>34-37</sup>.

### 193 **Statistical analysis**

194 In the case of measurement data that conforms to a normal distribution, the mean  $\pm$   
195 standard deviation is employed for representation, and intergroup comparison is  
196 carried out through the utilization of a t-test. Conversely, for measurement data that  
197 does not adhere to a normal distribution, the median (quartile) [M (P<sub>25</sub> ~ P<sub>75</sub>)] is  
198 employed for representation, and intergroup comparison is conducted using the  
199 Mann-Whitney U non-parametric test. Count data is represented using frequency and  
200 percentage (%), and intergroup comparison is performed using either the chi-square  
201 test or Fisher's exact probability method. The Breslow-Day test is employed for  
202 conformance testing in hierarchical analysis, while the Mantel-Haenszel test is  
203 utilized for hierarchical chi-square testing. To address potential confounding, logistic  
204 regression models were used to estimate the odds ratio (OR) and 95% CI for MACE.  
205 All statistical analyses were conducted using SPSS, version 22.0 (SPSS Inc, USA). A  
206 2-tailed *P* value of less than 0.05 was considered to be statistically significant.

### 207 **RESULTS**

208 **Table 1** presents the demographic characteristics of the study participants. A total of  
209 496 subjects were included in the analysis, comprising 225 individuals with pure  
210 CVD and 271 individuals with CVD accompanied by HBV infection. Notably, the  
211 CVD combined with HBV infection group exhibited a statistically significant increase  
212 in the proportion of males and AMI when compared to the CVD alone group (both *P*

213 < 0.05). Furthermore, when comparing patients with CVD alone to those with CVD  
214 combined with HBV, it was observed that the latter group exhibited elevated levels of  
215 HBsAg, HbsAb, and HbcAb (all  $P < 0.05$ ). Conversely, the CVD combined with  
216 HBV group displayed lower levels of weight, medication dosage, TG, Lpa, PLR, and  
217 PLT in comparison to the CVD alone group. Additionally, the proportions of diabetes  
218 and pre-hospital medication were relatively lower in the CVD combined with HBV  
219 group. Notably, the remaining indicators presented in **Table 1** did not demonstrate  
220 statistical significance. The quantitative (**Supplementary table 1**) and qualitative  
221 (**Supplementary table 2**) baseline characteristics and statistical comparisons of  
222 individuals with CVD who were either using or not using statins were also  
223 documented. It is evident that there are statistically significant differences in height,  
224 weight, platelet count, alanine aminotransferase levels, and aspartate aminotransferase  
225 levels among the three groups (all  $P < 0.05$ ). The utilization of statins resulted in  
226 lower TG ( $P = 0.000$ ), LDL-C ( $P = 0.000$ ), ApoB ( $P = 0.000$ ), and non-HDL-C ( $P =$   
227  $0.000$ ) levels. Based on the findings presented in **Supplementary table 2**, it is evident  
228 that there exist statistically significant disparities in gender, diabetes, and smoking  
229 history across the three groups, with or without statin usage (all  $P < 0.05$ ). It is worth  
230 noting that long-term use of statins has been associated with an increased risk of DM  
231 <sup>38</sup>. Consequently, clinicians may be avoiding prescribing statins to cardiovascular  
232 patients with diabetes, leading to a higher proportion of non-statin use in this  
233 population (65.8%). Conversely, no statistically significant variations were observed  
234 in hypertension, alcohol history, and anti-HBV treatment among the three groups (all

235  $P > 0.05$ ).

236 **Relationship of Statin Use with HBV Infection and Quantification.** To examine  
237 the relationship between statin use and HBV infection, we conducted a study  
238 comparing HBV infection rates and quantitative parameters in patients both with and  
239 without statin use. Our analysis revealed a significant association between statin use  
240 and HBV infection rates ( $\chi^2 = 76.835$ ,  $P = 0.000$ ). Subsequent pairwise comparisons  
241 demonstrated that the HBV infection rate in the group not using statins was 97.5%  
242 (77/79), whereas the rate in the group using atorvastatin 20 mg was 40.4% (91/225),  
243 indicating a protective effect with an OR of 0.018 (95% CI: 0.004 - 0.074). In the  
244 rosuvastatin 10 mg group, the HBV infection rate was 53.7% (102/190), indicating a  
245 potential protective effect with an OR of 0.030 (95% CI: 0.007 - 0.126). Furthermore,  
246 the HBV infection rate was 40.4% (91/225) in the atorvastatin 20 mg group and 53.7%  
247 (102/190) in the rosuvastatin 10 mg group, demonstrating a statistically significant  
248 difference between the two groups ( $P = 0.002$ ). This suggests that the HBV infection  
249 rate in the rosuvastatin 10mg group was relatively higher, with an odds ratio of 1.94  
250 (95% CI: 1.28 - 2.94) (**Table 2**). The HbsAg levels ranged from less than 0.05 to 250,  
251 the Median Difference (0-1) was calculated to be 70 (95% CI: 26 to 125). Additionally,  
252 the Median Difference (0-2) was found to be 63 (95% CI: 18 to 117). These findings  
253 indicate that the quantification of HbsAg in individuals using statins is notably  
254 reduced compared to those not using statins (**Table 3**). The analysis of the Median  
255 Difference (1-2) yielded a value of 0 (95% CI: 0 to 0), suggesting a lack of  
256 statistically significant disparity in the effectiveness of the two statins in reducing

257 HbsAg quantitation. However, the OR (atorvastatin/rosuvastatin) in Table 2 was  
258 calculated as 1.94 (95% CI: 1.28 to 2.94), indicating a lower infection rate associated  
259 with atorvastatin (**Table 3**). This apparent contradiction underscores the need for a  
260 nuanced interpretation that considers both qualitative and quantitative aspects of the  
261 investigation. Furthermore, when compared to the group not using statins, the  
262 quantification of HBV-DNA and HBcAb was significantly lower in the statins use  
263 group. Conversely, the quantification of HBsAb, HBeAg, and HBeAb was  
264 significantly higher in the statins use group (**Table 3**). In addition, **Table 4**  
265 demonstrates a significant dose-effect relationship between statin dosage and HbsAg  
266 quantification ( $P = 0.000$ ), indicating that higher doses result in lower HbsAg levels,  
267 with the exception of a slight rebound observed at the highest dose of rosuvastatin 20  
268 mg. Nevertheless, the limited sample size at this dosage level necessitates further  
269 validation of these findings.

270 **The impact of HBV infection, stratified by statins use, on multiple clinical**  
271 **outcomes among CVD patients.** In our study, atorvastatin and rosuvastatin emerge  
272 as the prevailing lipid-lowering medications, with atorvastatin 20 mg and rosuvastatin  
273 10 mg serving as the primary drug dosage combinations. This particular combination  
274 is employed as a stratification factor to examine the impact of HBV infection on 13  
275 clinical outcomes among individuals with CVD. According to the findings depicted in  
276 **Figure 2**, it was observed that HBV infection exhibited a protective effect on the  
277 occurrence of CHD (OR = 0.27, 95% CI: 0.12 – 0.60;  $P = 0.001$ ) and AP (OR = 0.56,  
278 95% CI: 0.36 – 0.86;  $P = 0.008$ ). Conversely, HBV infection was identified as a risk

279 factor for AMI (OR = 2.24, 95% CI: 1.40 – 3.57;  $P = 0.001$ ). Furthermore, it was  
280 determined that HBV infection did not significantly impact the remaining 11 clinical  
281 outcomes in individuals with CAD.

282 **The impact of HBV infection, stratified by DM, on multiple clinical outcomes**

283 **among CVD patients.** Given that the prevalence of DM among patients with and

284 without HBV infection was 48.7% and 62.7%, respectively ( $P = 0.002$ ; **Table 1**), it is

285 evident that the baseline characteristics were not equivalent. Consequently, the

286 presence of DM may exert an influence on cardiovascular outcomes. In this study,

287 DM was employed as a stratified variable to examine the potential impact of HBV

288 infection on clinical outcomes in patients with CVD. The results of our study indicate

289 that the coexistence of DM and HBV infection may significantly increase the risk of

290 AMI (OR = 5.37, 95% CI: 2.91 - 9.92;  $P < 0.001$ ) as well as unfavorable secondary

291 clinical outcomes (OR = 4.34, 95% CI: 2.06 - 9.15;  $P < 0.001$ ) (**Figure 3**). These

292 findings suggest the importance of implementing strict blood sugar control and

293 anti-HBV therapy in patients with this comorbidity.

294 **The impact of DM and HbA1c ( $\geq 6\%$  or  $< 6\%$ ) on multiple clinical outcomes**

295 **among CVD patients.** Based on the baseline characteristics of the population

296 statistics, a comprehensive analysis was conducted on a total of 496 individuals,

297 comprising 273 subjects with DM and 223 subjects without DM. The findings

298 revealed that, in comparison to the non-DM group, the DM group exhibited a notably

299 higher prevalence of hypertension history and the administration of atorvastatin 20

300 mg dosage (both  $P < 0.05$ ). Conversely, the prevalence of smoking history,

301 rosuvastatin 10 mg dosage, and overall statin usage were significantly lower in the  
302 DM group (all  $P < 0.05$ ). Furthermore, in comparison to the non-DM group, the DM  
303 group exhibited elevated levels of MO, NE, MHR, NHR, BNP, ALS, and HbA1c (all  
304  $P < 0.05$ ). Conversely, the DM group displayed a relatively diminished ApoE level  
305 when contrasted with the non-DM group. There were no statistically significant  
306 differences observed in various demographic and clinical factors, including age,  
307 gender, height, weight, BMI, alcohol consumption history, LDL-C level, TG level,  
308 HDL-C level, triglyceride-to-HDL-C ratio, ApoA level, ApoB level, Lp(a) level, TC  
309 level, non-HDL-C level, CYS-C level, LY count, PLT count, NLR, PLR, AST/ALT,  
310 AST level, TBil level, and ALP level, between the two groups (**Supplementary table**  
311 **3 and 4**). As shown in **Figure 4**, DM poses a significant risk for CHD (RO = 6.9, 95%  
312 CI: 3.2-14.9;  $P < 0.001$ ) among patients with CVD, MI (RO = 2.2, 95% CI: 1.5-3.2;  $P$   
313  $< 0.001$ ), AP patients who were not prescribed statins prior to admission (RO = 3.5,  
314 95% CI: 1.3-9.3;  $P = 0.01$ ), and individuals with hypertension extreme risk (RO = 2.9,  
315 95% CI: 2.0-4.2;  $P < 0.001$ ). Among patients who were not prescribed statins prior to  
316 admission, those with HbA1c levels  $\geq 6$  exhibited the highest susceptibility to CHD,  
317 as indicated by an OR of 34.4 (95% CI: 4.2 to 283.6). However, it is important to note  
318 that the OR results displayed significant variability due to the limited sample size of  
319 the CHD group, which consisted of only 14 cases (**Figure 5**). In addition, HbA1c  
320 levels  $\geq 6$  also be recognized as a significant risk factor of AP patients who were not  
321 prescribed statins prior to admission (RO = 1.6, 95% CI: 1.1-2.3;  $P = 0.019$ ) and  
322 individuals with hypertension extreme risk (RO = 2.7, 95% CI: 1.9-4.1;  $P < 0.001$ ;

323 **Figure 5).**

324 **Comparison of the effects of atorvastatin and rosuvastatin on multiple clinical**  
325 **outcomes in patients with CVD.** The **Supplementary table 5** presents a comparison  
326 of the effects of atorvastatin and rosuvastatin on 13 clinical outcomes in patients  
327 diagnosed with CVD. In comparison to patients prescribed atorvastatin, those  
328 prescribed rosuvastatin exhibited the higher susceptibility to CHD and CCU, with OR  
329 values of 2.1 (95% CI: 1.0 to 4.2;  $P = 0.047$ ) and 4.1 (95% CI: 2.5 to 6.6;  $P < 0.001$ ),  
330 respectively. Additionally, the proportion of patients with NYHA classification and a  
331 lower risk of UAP were 0.51 (95% CI: 0.32 to 0.79;  $P = 0.003$ ) and 0.62 (95% CI:  
332 0.39 to 0.99;  $P = 0.043$ ), respectively. In comparison to atorvastatin, the  
333 administration of rosuvastatin resulted in a statistically significant decrease in the  
334 median duration of hospitalization by one day, with a 95% CI ranging from 0.0 to 1.0  
335 day ( $P = 0.001$ ; **Supplementary table 6**).

336 **Interaction of statin use with hepatic FIB-4, complete blood count-derived**  
337 **inflammation indexes (CBCIIs) or ALBI grade.** The baseline characteristics and  
338 statistical comparisons of both quantitative (**Supplementary table 7**) and qualitative  
339 (**Supplementary table 8**) parameters of individuals with CVD were using or not  
340 using statins. Significant differences were observed in height, weight, platelet count,  
341 ALT levels, and AST levels among the three groups (all  $P < 0.05$ ). The use of statins  
342 led to a significant decrease in levels of TG, LDL-C, ApoB, and non-HDL-C (all  $P =$   
343 0.000) (**Supplementary table 7**). Analysis of the data in **Supplementary table 8**  
344 reveals statistically significant differences in gender, diabetes, and smoking history



345 among the three groups (all  $P < 0.05$ ). In order to assess the potential impact of statin  
346 use on improving clinical outcomes related to CVD by inhibiting the progression of  
347 liver fibrosis, we conducted a study to examine the association of different statin  
348 drugs and doses with FIB-4 levels in patients with CVD. The findings of our study  
349 demonstrated that atorvastatin was associated with lower FIB-4 levels in comparison  
350 to non-statin users, whereas rosuvastatin did not exhibit a significant difference in  
351 FIB-4 levels compared to non-statin users (**Supplementary table 9**). Our study also  
352 revealed that the use of statins was associated with a reduction in the levels of SIRI  
353 and SIRI/HDL-C, while also leading to an increase in PMR and SII in patients with  
354 CVD (**Supplementary table 9**). The findings of dose-stratification analysis in CVD  
355 patients revealed a correlation between the increased dosage of atorvastatin and  
356 rosuvastatin and the reduction in FIB-4 levels, suggesting the presence of a  
357 dose-response relationship (**Supplementary table 10**). Concurrently, a FIB-4  
358 stratification analysis was conducted, revealing that patients treated with atorvastatin  
359 exhibited a higher proportion of  $\text{FIB-4} < 1.45$  and a lower proportion of  $\text{FIB-4} > 3.25$ .  
360 Nevertheless, the reduction in FIB-4 level with rosuvastatin was not as pronounced as  
361 with atorvastatin (**Supplementary table 11**).

362 The ALBI grade is a liver function assessment tool that utilizes measurements of  
363 albumin and bilirubin levels. The study examined the impact of statin medications on  
364 liver function markers and ALBI grade. Statin use was found to significantly decrease  
365 DBIL levels compared to non-statin users, while showing no significant effect on  
366 other liver function indices, including ALBI grade (**Supplementary table 12**).

367 Stratified analysis based on ALBI grade revealed that none of the patients progressed  
368 to an ALBI grade  $\geq -1.39$ , indicative of the group with the poorest prognosis.  
369 Furthermore, statin drug use did not influence ALBI grade in the remaining two  
370 groups (**Supplementary table 13**).

371 **Effect of statin use on atherogenic indices.** As shown in **Supplementary table 14**,  
372 In comparison to statin-free group, the group with statin use exhibited a significant  
373 decrease in levels of AI, CRI-I, CRI-II, and LCI, whereas adjusted AIP, AIP, and  
374 RLP-C did not show a statistically significant difference.

375

## 376 **DISCUSSION**

377 In our study, the baseline data analysis revealed that individuals with both HBV and  
378 CVD exhibited notably reduced levels of TG and Lp(a) compared to those with CVD  
379 alone. This observation could potentially be attributed to the varying prevalence of  
380 diabetes and the utilization of statins among the patient population. Consequently, it is  
381 imperative to stratify the HBV cohort based on their statin and diabetes risk profiles in  
382 order to comprehensively assess the diverse clinical outcomes in patients with CVD.  
383 The utilization of statins has the capacity to diminish the prevalence of CHD and AP  
384 among individuals with CVD associated with HBV infection. Stratification analysis,  
385 considering the presence of DM, revealed a notably heightened susceptibility to MI,  
386 AMI, and HF in patients with HBV infection combined with CVD. These findings  
387 imply that CVD patients with HBV infection should judiciously employ statins and  
388 effectively manage blood glucose levels.

389 HBV infection has the potential to give rise to a range of intrahepatic and extrahepatic

390 ailments, encompassing acute and chronic hepatitis, cirrhosis, hepatocellular  
391 carcinoma, metabolic syndrome, CVD, and renal injury<sup>39-41</sup>. The pathogenesis of  
392 HBV infection is intricate and multifaceted, essentially manifesting as a multisystem  
393 disorder. The underestimation of the influence of HBV infection on atherosclerosis  
394 has been observed in academic research. Multiple studies have demonstrated that the  
395 inflammation triggered by HBV infection serves as a significant contributing factor to  
396 the development of atherosclerosis. Conversely, atherosclerosis also exerts subsequent  
397 effects on the severity of chronic HBV infection, thereby establishing a detrimental  
398 cycle<sup>17</sup>. In patients concomitant HBV and MAFLD decreases the risk of ASCVD  
399 when compared with MAFLD alone, which may attribute to antiviral treatment<sup>41</sup>.  
400 The findings of present studies<sup>17,41</sup> and our research indicate that the implementation  
401 of either antiviral therapy or lipid-lowering statin therapy holds the potential to  
402 improve liver metabolism or liver injury, consequently reducing the susceptibility to  
403 CVD associated with HBV infection.

404 Our study revealed that HBV infection posed a significant risk for AMI in patients  
405 with CVD (OR = 2.24, 95% CI: 1.40-3.57;  $P = 0.001$ ). However, our findings did not  
406 indicate a significant association between HBV infection and MI (OR = 1.08, 95%CI:  
407 0.69-1.68;  $P = 0.815$ ). Analysis of baseline data demonstrated that the proportion of  
408 AMI in patients with both HBV infection and CVD was 39.1% (106/271), which was  
409 significantly higher than the proportion in patients with CVD alone (23.1%) (52/225;  
410  $P < 0.001$ ). Currently, there is a lack of pertinent research indicating that HBV  
411 infection serves as a risk factor for AMI. Furthermore, the underlying physiological

412 and pathological mechanisms by which HBV infection may contribute to an increased  
413 risk of AMI in patients with CVD remain unclear. It is plausible that our findings may  
414 be attributed to potential data bias, as we did not conduct a multivariate regression  
415 analysis. Moreover, a comprehensive epidemiological investigation with larger  
416 sample sizes is necessary to ascertain the risk of HBV infection in relation to AMI.

417 According to a comprehensive survey of over 90,000 individuals, patients with HBV  
418 and DM was found to be associated with significantly reduced risks of MI (aHR =  
419 0.49; 95% CI: 0.42 to 0.56), ischaemic stroke (aHR = 0.61; 95% CI: 0.56 to 0.67), HF  
420 (aHR = 0.50; 95% CI: 0.43 to 0.59), and all-cause mortality (aHR = 0.72; 95% CI:  
421 0.70 to 0.75) when compared to DM alone <sup>14</sup>, while the researchers did not provide a  
422 specific explanation. Hence, the association between enhanced liver metabolism  
423 through antiviral therapy in patients with HBV and its potential correlation with  
424 MACE, HF, and all-cause mortality remains uncertain. In our study, the findings of  
425 risk stratification based on DM indicate that HBV infection is associated with a  
426 decreased risk of CDH in patients with CVD (OR = 0.32, 95% CI: 0.15-0.68;  $P =$   
427 0.004). However, when HBV infection is combined with DM, it is associated with an  
428 increased risk of MI (OR = 2.12, 95% CI: 1.30 – 3.45;  $P = 0.002$ ), AMI (OR = 5.37,  
429 95% CI: 2.91 – 9.92;  $P < 0.001$ ), and HF (OR = 2.58, 95% CI: 1.32 - 5.04;  $P = 0.005$ ).

430 These findings indicate that the clinical consequences linked to HBV infection in  
431 individuals with DM may have both positive and negative implications, contingent  
432 upon various confounding variables including the patient's baseline characteristics,  
433 antiviral therapy, diabetes management, and statin administration.

434 Furthermore, a comprehensive analysis was conducted on a cohort of 496 patients  
435 diagnosed with CVD to examine the variations in clinical and biochemical markers  
436 between individuals with CVD and DM and those without DM. Additionally, the  
437 impact of HbA1c levels and DM on various clinical outcomes in patients with CVD  
438 was investigated. Moreover, the effects of atorvastatin and rosuvastatin on multiple  
439 clinical outcomes in individuals with CVD were also examined. The correlation  
440 between DM and the extent of CVD has been examined in prior populations <sup>42</sup>. The  
441 investigation revealed that DM is linked to a greater occurrence of cardiogenic shock,  
442 more severe stenosis ( $\geq 70\%$ ) segments, and a higher frequency of complications <sup>43</sup>. A  
443 recent study encompassed a sample of 23,643 individuals who underwent consecutive  
444 coronary CT angiography. In comparison to non-DM patients, those with diabetes  
445 exhibited a heightened prevalence of obstructive CAD, characterized by more  
446 pronounced stenosis in both the proximal and middle segments of the coronary  
447 arteries <sup>44</sup>. HbA1c serves as a precise diagnostic marker for diabetes, enabling the  
448 assessment of average blood sugar levels over a span of 2-3 months, while remaining  
449 minimally influenced by acute illnesses. Moreover, it holds the potential to inform  
450 treatment decisions. Subjects with HbA1c levels ranging from 5.7% to 6.4% exhibited  
451 elevated levels of coronary artery calcium and carotid intima-media thickness  
452 compared to subjects with HbA1c levels below 5.7%, suggesting that an increase in  
453 HbA1c levels is linked to an augmented burden of coronary and peripheral  
454 atherosclerosis in non-diabetic individuals with normal fasting glucose <sup>45</sup>. A  
455 significant correlation was observed between the decrease in HbA1c levels and the

456 reduction in HR for MACE<sup>46</sup>. The meta-regression analysis further demonstrated that  
457 the mitigation of cardiovascular events among adult individuals with DM can be  
458 partially attributed to a decrease in HbA1c levels<sup>47</sup>. Patients diagnosed with T2DM  
459 who exhibit inadequate control of their HbA1c levels (ranging from 8% to 8.9% and  
460 equal to or greater than 9%) are found to have comparable or elevated mortality risks  
461 when compared to patients diagnosed with CVD<sup>48</sup>. Consequently, it is imperative to  
462 prioritize achieving optimal HbA1c levels in order to effectively mitigate risks,  
463 prevent mortality, and manage complications associated with DM.

464 The results of our study indicate that elevated HbA1c levels and the presence of DM  
465 have a significant influence on various clinical outcomes among individuals  
466 diagnosed with CVD. Specifically, our findings demonstrate that individuals with DM  
467 and HbA1c levels  $\geq 6\%$  are at an increased risk for developing CHD, experiencing MI,  
468 AP, and hypertension. Furthermore, our study examined the impact of both  
469 atorvastatin and rosuvastatin on various clinical outcomes among individuals  
470 diagnosed with CVD. Notably, patients administered rosuvastatin exhibited the  
471 greatest susceptibility to CHD and admission to the CCU, accompanied by elevated  
472 rates of NYHA classification. Conversely, these individuals experienced a diminished  
473 likelihood of developing UAP.

474 The findings of our study suggest an association between statin use and a decreased  
475 risk of HBV infection, potentially due to the inhibitory effects of statins on  
476 HBV-DNA replication or clearance. It may be prudent to consider reducing or  
477 discontinuing statin therapy in patients with HBV infection who exhibit transaminase

478 levels exceeding three times the upper limit of normal. Hence, it is important to  
479 acknowledge the potential for bias in this conclusion. Additionally, the administration  
480 of anti-HBV therapy to patients with HBV infection could potentially impact the  
481 outcome. The quantification of HBV infection in this study was based on HBsAg  
482 levels, and while statin use may reduce HBV-DNA levels until they become  
483 undetectable, it is unlikely to result in clearance of HBsAg. Multiple studies have  
484 documented the potential of statins to decrease the likelihood of advancing to  
485 cirrhosis and hepatocellular carcinoma in individuals with HBV infection<sup>49-54</sup>. This is  
486 attributed to the inhibition or eradication of HBV, which is believed to impede the  
487 progression to cirrhosis and liver cancer. Klundert et al.<sup>54</sup> discovered that statins  
488 inhibit the replication of the hepatitis B virus and decrease the viability of hepatoma  
489 cells by disrupting Rho-GTPases. Our findings align with this consensus. Furthermore,  
490 the HBV viral load remains relatively constant in the absence of effective anti-HBV  
491 treatment, suggesting that factors other than statins have minimal impact. Therefore, it  
492 is plausible to infer that the proposition of statins inhibiting or eradicating HBV is  
493 likely valid.

494 To delve deeper into the potential mechanisms of statin therapy in CVD patients to  
495 improve clinical outcomes, we conducted additional research on the impact of statin  
496 therapy on hepatic function, atherosclerotic burden, and systemic inflammation. The  
497 importance of FIB-4 and ALBI grade as the non-invasive indicators for liver fibrosis  
498 in predicting CVD among patients with liver diseases or DM has been well  
499 documented<sup>55-59</sup>. Schonmann et al.<sup>58</sup> found that individuals with advanced fibrosis

500 (FIB-4  $\geq$  2.67) had a significantly higher risk of cardiovascular disease (HR = 1.60,  
501 95% CI: 1.27-2.01) compared to those with inconclusive fibrosis (HR = 1.15, 95% CI:  
502 1.01-1.31). Chun et al.<sup>59</sup> found a significant difference in the cumulative incidence of  
503 CVD among groups stratified by FIB-4. The severity of liver fibrosis was found to  
504 independently predict the occurrence of CVD in patients with T2DM. Additionally,  
505 the study revealed that the utilization of statins may serve as a protective factor (HR =  
506 0.603) among individuals with T2DM, thereby mitigating the likelihood of  
507 developing CVD<sup>59</sup>. FIB-4 may have utility in the identification of individuals at  
508 elevated risk of CVD within the population of patients diagnosed with NAFLD.  
509 Conversely, the use of APRI for this purpose is not advised<sup>60</sup>. Our findings indicate  
510 that FIB-4 may be more effective than ALBI in assessing liver function in patients  
511 undergoing atorvastatin therapy. This is primarily due to the ability of FIB-4 to  
512 accurately monitor patients with severe liver damage, which was notably reduced in  
513 those receiving atorvastatin treatment. Prior research has indicated that statins may  
514 impact the levels of AST and ALT in NAFLD patients, as well as suggested that FIB-4  
515 as a non-invasive test has an ability to predict hepatic fibrosis<sup>61</sup>.  
516 More importantly, our study revealed that both Atorvastatin and Rosuvastatin  
517 exhibited a dose-dependent reduction in FIB-4 levels among patients with CVD. A  
518 notable increase in the number of patients with FIB-4 grade  $<$  1.45 and a decrease in  
519 those with FIB-4 grade  $>$  3.25 were observed, particularly atorvastatin administration.  
520 Simon and colleagues<sup>62</sup> found that the use of statins was linked to a decrease in  
521 incident cirrhosis in a dose-dependent manner. Mohanty et al.<sup>63</sup> discovered that statin



522 use in patients with HCV is correlated with a reduction of over 40% in the risk of  
523 cirrhosis. The prevalence of cirrhosis was found to be 8% lower in the group  
524 receiving statin treatment compared to the statins-free group<sup>64</sup>. Furthermore, the use  
525 of statins was correlated with a reduced advancement of liver fibrosis and occurrence  
526 of hepatocellular carcinoma in a substantial population of Veterans with HCV  
527 infection<sup>64</sup>. The collective findings of these studies<sup>62-64</sup> and our own research  
528 indicate that statins exhibit the most pronounced antifibrotic effects.

529 CBCII is an important predictor of chronic non-infectious inflammatory response,  
530 which is associated with the development of various metabolic system disorders such  
531 as fibrosis, hypertension, hyperlipidemia, and hyperglycemia<sup>65-67</sup>. SIRI and SII are  
532 the two important inflammation indicators based on peripheral blood cell count<sup>32, 68</sup>.  
533 Prospective investigations have identified a correlation between elevated levels of  
534 white blood cells and their subtypes, such as neutrophils, monocytes, and  
535 lymphocytes, with an augmented susceptibility to coronary heart disease and stroke.  
536 Neutrophils are capable of releasing a plethora of inflammatory mediators,  
537 chemokines, and oxygen free radicals, thereby instigating endothelial cell damage,  
538 consequent tissue ischemia, and a pivotal role in the inflammatory response of  
539 atherosclerosis<sup>32,68,69</sup>. The activation and differentiation of monocytes into lipid-laden  
540 macrophages is a critical step in the pathogenesis of atherosclerotic plaques<sup>32,68,69</sup>.  
541 Consequently, novel systemic inflammatory markers, such as the SII and SIRI, which  
542 are derived from neutrophil counts and other parameters, are likely to be correlated  
543 with unfavorable cardiovascular outcomes. In our study, contrasting outcomes were

544 observed between SIRI and SII in assessing the impact of statin use in CVD patients.  
545 Specifically, our findings demonstrated a decrease in SIRI levels and an increase in  
546 SII levels in patients with CVD following statin therapy. Li et al.<sup>70</sup> demonstrated that  
547 SIRI is a strong predictor of all-cause mortality in CAD patients with low residual  
548 inflammatory risk. Numerous studies have indicated that the SII may serve as a  
549 potential biomarker for the development of CVD, with elevated levels of SII being  
550 linked to an increased risk of CVD<sup>71-73</sup>. SII and SIRI have been linked to  
551 cardiovascular disease, yet the impact of statin therapy on these indices remains  
552 inconclusive. Following statin therapy, SII levels exhibited a significant increase,  
553 whereas SIRI levels showed a significant decrease. Consequently, the influence of  
554 statin therapy on the systemic inflammatory response in CVD patients remains  
555 uncertain and warrants further validation in a larger cohort.

556 Utilizing initial data, our study determined that the utilization of statins resulted in a  
557 significant decrease in TC and LDL-C levels. Additionally, we conducted a thorough  
558 examination of the impact of statin use on atherogenic indices among individuals  
559 diagnosed with CVD. Higher values of novel atherogenic indices, including AIP,  
560 CRI-I, CRI-II, and LCI, were found to be significantly associated with an increased  
561 risk of coronary artery disease (CAD) when compared to lower values<sup>35</sup>. Many  
562 investigations indicate that the AIP serves as a novel marker in the contemporary  
563 landscape of CVD, with elevated AIP emerging as an independent prognostic factor in  
564 patients with CAD<sup>74-77</sup>. AI was independently associated with all-cause and CVD  
565 mortality among patients undergoing peritoneal dialysis<sup>37</sup>. Following adjustments for

566 potential confounders, the highest of AI value exhibited a notably increased hazard  
567 ratio for both all-cause mortality and CVD mortality when compared to the lowest AI  
568 value<sup>37</sup>. Hence, the majority of atherogenicity indicators hold significant implications  
569 for the diagnosis and prognosis of CVD risk events. Currently, there is a lack of  
570 relevant literature examining the relationship between statin use and atherogenicity  
571 indicators. Our research indicates that the use of statins has a significant impact on  
572 reducing levels of AI, CRI-I, CRI-II, and LCI. These findings suggest that statins may  
573 have a positive effect on liver fibrosis by improving lipid metabolism. Additionally,  
574 atherogenic indices such as AI, CRI-I, CRI-II, and LCI could serve as valuable  
575 markers for assessing liver fibrosis in patients undergoing statin therapy for CVD.

576 It is important to acknowledge that our study has several limitations. Firstly, the  
577 recruitment of patients was limited to a single center, and the sample size was  
578 moderate. Secondly, there is a dearth of information pertaining to the duration of  
579 hyperlipidemia, hypertension, and diabetes. Consequently, when assessing the impact  
580 of diabetes and its complications, it is not possible to disregard the potential influence  
581 of unmeasured confounding factors. Thirdly, the measurement of HbA1c may be  
582 susceptible to interference from hemoglobin variants, hereditary hemoglobinopathies,  
583 thalassemia, and iron-deficiency anemia. However, HbA1c serves as a reliable  
584 indicator of prolonged blood glucose regulation and exhibits reduced inter-individual  
585 variability in contrast to impaired glucose tolerance and fasting plasma glucose.

586 Moreover, it is crucial to acknowledge that our analysis solely encompasses a single  
587 measurement of HbA1c, thereby rendering the alterations in glycemic control

588 parameters indeterminate. Furthermore, this investigation solely encompasses  
589 inpatient data, precluding the assessment of long-term follow-up. Consequently, it is  
590 advisable to employ more sophisticated methodologies, such as cohort studies, to  
591 further investigate this matter.

## 592 **CONCLUSION**

593 Our study indicates that CVD patients who also have HBV infection may experience  
594 a reduction in MACEs when treated with statins. DM with an HBA1c level of  $\geq 6$  is  
595 identified as risk factor for the development of CHD, MI, AP, and hypertension. The  
596 implementation of statins has demonstrated the potential to reduce the incidence of  
597 CHD and AP in individuals with CVD. The analysis of stratification, taking into  
598 account the presence of DM, has demonstrated a significantly increased vulnerability  
599 to MI, AMI, and HF among individuals with HBV infection combined with CVD.  
600 Furthermore, our findings reveal that long-term glycemic control should be prioritized  
601 in this patient population. Our findings also indicate that FIB-4 could serve as a  
602 potential indicator for assessing liver function in individuals undergoing treatment  
603 with statins. Statin therapy resulted in reduction in TC and LDL-C levels, as well as  
604 improvement of atherogenicity markers such as AI, CRI-I, CRI-II, and LCI. The  
605 results of our study indicate that statins may potentially ameliorate liver fibrosis  
606 through enhancement of lipid metabolism. Furthermore, atherogenic indices including  
607 AI, CRI-I, CRI-II, and LCI may serve as useful indicators for evaluating liver fibrosis  
608 in individuals receiving statin treatment for CVD. The observed improvements in  
609 hepatic function, atherosclerotic burden, and systemic inflammation associated with

610 statin therapy may contribute to the favorable outcomes among individuals with CVD.

611

612 **Sources of Funding**

613 This work received financial support from the Natural Science Foundation of Shaanxi

614 Province, China (Grant No. 2022SF-243).

615 **Disclosures**

616 Prof. Wang received grants from the Natural Science Foundation of Shaanxi Province,

617 China. The authors declare that they have no competing interests.

618 **Supporting information**

619 **Table S1-Table S14.**

620 **REFERENCES**

- 621 1. Global, regional, and national age-sex-specific mortality for 282 causes of  
622 death in 195 countries and territories, 1980-2017: A systematic analysis for the  
623 global burden of disease study 2017. *Lancet (London, England)*.  
624 2018;392:1736-1788. doi: [10.1016/S0140-6736 \(18\) 32203-7](https://doi.org/10.1016/S0140-6736(18)32203-7).
- 625 2. Stone PH, Libby P, Boden WE. Fundamental pathobiology of coronary  
626 atherosclerosis and clinical implications for chronic ischemic heart disease  
627 management-the plaque hypothesis: A narrative review. *JAMA cardiology*.  
628 2023;8:192-201. doi: [10.1001/jamacardio.2022.3926](https://doi.org/10.1001/jamacardio.2022.3926).
- 629 3. Kamstrup PR. Lipoprotein(a) and cardiovascular disease. *Clinical chemistry*.  
630 2021;67:154-166. doi: [10.1093/clinchem/hvaa247](https://doi.org/10.1093/clinchem/hvaa247).
- 631 4. Ference BA, Graham I, Tokgozoglul L, Catapano AL. Impact of lipids on  
632 cardiovascular health: Jacc health promotion series. *Journal of the American*  
633 *College of Cardiology*. 2018;72:1141-1156. doi: [10.1016/j.jacc.2018.06.046](https://doi.org/10.1016/j.jacc.2018.06.046).
- 634 5. Vujkovic M, Keaton JM, Lynch JA, Assimes TL, Chang KM, Cho K, Lee JS,  
635 Gaziano JM, Phillips LS, Damrauer SM, DuVall SL, Gao L, Kaestner KH,  
636 Susztak K. Discovery of 318 new risk loci for type 2 diabetes and related  
637 vascular outcomes among 1.4 million participants in a multi-ancestry  
638 meta-analysis. *Nature genetics*. 2020;52:680-691. doi:  
639 [10.1038/s41588-020-0637-y](https://doi.org/10.1038/s41588-020-0637-y).
- 640 6. Clarke R, Von Ende A, Hill M, Hopewell JC, Hughes AD, Mayr M, Pechlaner  
641 R, Schmidt LE, Theofilatos K, Watkins H, Watkins H, Yin X. Apolipoprotein

- 642 proteomics for residual lipid-related risk in coronary heart disease. *Circulation*  
643 *research*. 2023;132:452-464. doi: [10.1161/CIRCRESAHA.122.321690](https://doi.org/10.1161/CIRCRESAHA.122.321690).
- 644 7. Huang Y, Ren Y, Yang H, Ding Y, Liu Y, Yang Y, Mao A, Yang T, Wang Y,  
645 Xiao F, He Q, Zhang Y. Using a machine learning-based risk prediction model  
646 to analyze the coronary artery calcification score and predict coronary heart  
647 disease and risk assessment. *Computers in biology and medicine*.  
648 2022;151:106297. doi: [10.1016/j.combiomed.2022.106297](https://doi.org/10.1016/j.combiomed.2022.106297).
- 649 8. Grandhi GR, Mirbolouk M, Dardari ZA, Al-Mallah MH, Rumberger JA, Shaw  
650 LJ, Blankstein R, Miedema MD, Berman DS, Budoff MJ, Krumholz HM,  
651 Blaha MJ, Nasir K. Interplay of coronary artery calcium and risk factors for  
652 predicting cvd/chd mortality: The cac consortium. *JACC. Cardiovascular*  
653 *imaging*. 2020;13:1175-1186. doi: [10.1016/j.jcmg.2019.08.024](https://doi.org/10.1016/j.jcmg.2019.08.024).
- 654 9. Brown A, Reynolds LR, Bruemmer D. Intensive glycemic control and  
655 cardiovascular disease: An update. *Nature reviews. Cardiology*.  
656 2010;7:369-375. doi: [10.1038/nrcardio.2010.35](https://doi.org/10.1038/nrcardio.2010.35).
- 657 10. Nauta ST, Deckers JW, Akkerhuis KM, van Domburg RT. Short- and  
658 long-term mortality after myocardial infarction in patients with and without  
659 diabetes: Changes from 1985 to 2008. *Diabetes care*. 2012;35:2043-2047. doi:  
660 [10.2337/dc11-2462](https://doi.org/10.2337/dc11-2462)
- 661 11. Zhang YY, Hu KQ. Rethinking the pathogenesis of hepatitis b virus (hbv)  
662 infection. *Journal of medical virology*. 2015;87:1989-1999. doi:  
663 [10.1002/jmv.24270](https://doi.org/10.1002/jmv.24270).

- 664 12. Cacoub P, Asselah T. Hepatitis b virus infection and extra-hepatic  
665 manifestations: A systemic disease. *The American journal of gastroenterology*.  
666 2022;117:253-263. doi: [10.14309/ajg.0000000000001575](https://doi.org/10.14309/ajg.0000000000001575).
- 667 13. Hamilton EM, Yang L, Avery D. Chronic hepatitis b virus infection and risk of  
668 stroke types: A prospective cohort study of 500 000 chinese adults. *Stroke*.  
669 2023;54:3046-3053. doi: [10.1161/STROKEAHA.123.043327](https://doi.org/10.1161/STROKEAHA.123.043327).
- 670 14. Kuo CS, Chen YT, Hsu CY, Chang CC, Chou RH, Li SY, Kuo SC, Huang PH,  
671 Chen JW, Lin SJ. The impact of chronic hepatitis b infection on major adverse  
672 cardiovascular events and all-cause mortality in patients with diabetes: A  
673 nationwide population-based study from taiwan. *BMJ open*. 2017;7:e016179.  
674 doi: [10.1136/bmjopen-2017-016179](https://doi.org/10.1136/bmjopen-2017-016179).
- 675 15. Ke ZP, Gong M, Zhao G, Geng Y, Cheng K. Association between hbv  
676 infection and the prevalence of coronary artery disease in the us population.  
677 *Computational and mathematical methods in medicine*. 2022;2022:5062798.  
678 doi: [10.1155/2022/5062798](https://doi.org/10.1155/2022/5062798).
- 679 16. Kumar A, Shariff M, Doshi R. Association between past hepatitis b infection  
680 and ischemic heart disease: An analysis from the 2007-2016 nhanes data. *The*  
681 *American journal of the medical sciences*. 2020;360:372-377. doi:  
682 [10.1016/j.amjms.2020.05.034](https://doi.org/10.1016/j.amjms.2020.05.034).
- 683 17. Ranković I, Milivojević V, Pavlović Marković A, Bezmarević M. Interplay  
684 between chronic hepatitis b and atherosclerosis: Innovative perspectives and  
685 theories. *World journal of gastroenterology*. 2022;28:497-499. doi:



- 686 [10.3748/wjg.v28.i4.497](https://doi.org/10.3748/wjg.v28.i4.497).
- 687 18. Wu VC, Chen TH, Wu M, Cheng CW, Chen SW, Chang CW, Chen CC, Chang  
688 SH, Hung KC, Chern MS, Lin FC, Chu PH, Wu CS. Comparison of  
689 cardiovascular outcomes and all-cause mortality in patients with chronic  
690 hepatitis b and c: A 13-year nationwide population-based study in asia.  
691 *Atherosclerosis*. 2018;269:178-184. doi:  
692 [10.1016/j.atherosclerosis.2018.01.007](https://doi.org/10.1016/j.atherosclerosis.2018.01.007).
- 693 19. Kim D, Adejumo AC, Yoo ER, Iqbal U, Li AA, Pham EA, Cholankeril G,  
694 Glenn JS, Ahmed A. Trends in mortality from extrahepatic complications in  
695 patients with chronic liver disease, from 2007 through 2017. *Gastroenterology*.  
696 2019;157:1055-1066.e1011. doi: [10.1053/j.gastro.2019.06.026](https://doi.org/10.1053/j.gastro.2019.06.026).
- 697 20. Liu XY, Zhou Y. Influence of hepatitis b virus on the prevalence of diabetes  
698 complications in patients with type 2 diabetes. *Journal of diabetes*  
699 *investigation*. 2023;14:429-434. doi: [10.1111/jdi.13954](https://doi.org/10.1111/jdi.13954).
- 700 21. Arnett DK, Blumenthal RS, Albert MA, Buroker AB, Goldberger ZD, Hahn  
701 EJ, Himmelfarb CD, Khera A, Lloyd-Jones D, McEvoy JW, Michos ED,  
702 Miedema MD, Muñoz D, Smith SC, Jr., Virani SS, Williams KA, Sr., Yeboah J,  
703 Ziaieian B. 2019 acc/aha guideline on the primary prevention of cardiovascular  
704 disease: A report of the american college of cardiology/american heart  
705 association task force on clinical practice guidelines. *Circulation*.  
706 2019;140:e596-e646. doi: [10.1161/CIR.0000000000000678](https://doi.org/10.1161/CIR.0000000000000678).
- 707 22. Lu Y, Zhang H, Lu J, Ding Q, Li X, Wang X, Sun D, Tan L, Mu L, Liu J, Feng

- 708 F, Yang H, Zhao H, Schulz WL, Krumholz HM, Pan X, Li J. Prevalence of  
709 dyslipidemia and availability of lipid-lowering medications among primary  
710 health care settings in china. *JAMA network open*. 2021;4:e2127573. doi:  
711 [10.1001/jamanetworkopen.2021.27573](https://doi.org/10.1001/jamanetworkopen.2021.27573).
- 712 23. Sharpton SR, Loomba R. Emerging role of statin therapy in the prevention and  
713 management of cirrhosis, portal hypertension, and hcc. *Hepatology (Baltimore,*  
714 *Md.)*. 2023;78:1896-1906. doi: [10.1097/HEP.000000000000278](https://doi.org/10.1097/HEP.000000000000278).
- 715 24. Cho Y, Rhee H, Kim YE, Lee M, Lee BW, Kang ES, Cha BS, Choi JY, Lee  
716 YH. Ezetimibe combination therapy with statin for non-alcoholic fatty liver  
717 disease: An open-label randomized controlled trial (essential study). *BMC*  
718 *medicine*. 2022;20:93. doi: [10.1186/s12916-022-02288-2](https://doi.org/10.1186/s12916-022-02288-2).
- 719 25. Shaffer LR, Mahmud N. Statins in cirrhosis: Hope or hype? *Journal of clinical*  
720 *and experimental hepatology*. 2023;13:1032-1046. doi:  
721 [10.1016/j.jceh.2023.05.002](https://doi.org/10.1016/j.jceh.2023.05.002).
- 722 26. Dongiovanni P, Petta S, Mannisto V, Mancina RM, Pipitone R, Karja V,  
723 Maggioni M, Kakela P, Wiklund O, Mozzi E, Grimaudo S, Kaminska D,  
724 Rametta R, Craxi A, Fargion S, Nobili V, Romeo S, Pihlajamaki J, Valenti L.  
725 Statin use and non-alcoholic steatohepatitis in at risk individuals. *Journal of*  
726 *hepatology*. 2015;63:705-712. doi: [10.1016/j.jhep.2015.05.006](https://doi.org/10.1016/j.jhep.2015.05.006).
- 727 27. Tessier CM, Polyzos SA, Athyros VG, Mantzoros CS. Long-term statin  
728 treatment for hepatic fibrosis in patients with nonalcoholic fatty liver disease:  
729 Is it time to give the emperor a statin robe? *Metabolism: clinical and*

- 730 *experimental*. 2021;121:154796. doi: [10.1016/j.metabol.2021.154796](https://doi.org/10.1016/j.metabol.2021.154796).
- 731 28. Boutari C, Pappas PD, Anastasilakis D, Mantzoros CS. Statins' efficacy in  
732 non-alcoholic fatty liver disease: A systematic review and meta-analysis.  
733 *Clinical nutrition (Edinburgh, Scotland)*. 2022;41:2195-2206. doi:  
734 [10.1016/j.clnu.2022.08.001](https://doi.org/10.1016/j.clnu.2022.08.001).
- 735 29. Navarro P, Gutiérrez-Ramírez L, Arias Á, Lucendo AJ, Tejera-Muñoz A.  
736 Systematic review and meta-analysis: Prevalence of non-alcoholic fatty liver  
737 disease and liver fibrosis in patients with inflammatory bowel disease.  
738 *Nutrients*. 2023;15:4507. doi: [10.3390/nu15214507](https://doi.org/10.3390/nu15214507).
- 739 30. Martínez-Domínguez SJ, García-Mateo S, Laredo V, Gargallo-Puyuelo CJ,  
740 Gallego Llera B, López de la Cruz J, Gomollón F. Liver fibrosis in  
741 non-alcoholic fatty liver disease and progression to hepatocellular carcinoma  
742 in patients with inflammatory bowel disease: A systematic review. *Cancers*.  
743 2023;15:3367. doi: [10.3390/cancers15133367](https://doi.org/10.3390/cancers15133367).
- 744 31. Tian YB, Niu H, Xu F, Shang-Guan PW, Song WW. Albi score combined with  
745 fib-4 index to predict post-hepatectomy liver failure in patients with  
746 hepatocellular carcinoma. *Scientific reports*. 2024;14:8034. doi:  
747 [10.1038/s41598-024-58205-5](https://doi.org/10.1038/s41598-024-58205-5).
- 748 32. Li J, He D, Yu J, Chen S, Wu Q, Cheng Z, Wei Q, Xu Y, Zhu Y, Wu S.  
749 Dynamic status of sII and sIRI alters the risk of cardiovascular diseases:  
750 Evidence from kailuan cohort study. *Journal of inflammation research*.  
751 2022;15:5945-5957. doi: [10.2147/JIR.S378309](https://doi.org/10.2147/JIR.S378309).

- 752 33. Xiu J, Lin X, Chen Q, Yu P, Lu J, Yang Y, Chen W, Bao K, Wang J, Zhu J,  
753 Zhang X, Pan Y, Tu J, Chen K, Chen L. The aggregate index of systemic  
754 inflammation (aisi): A novel predictor for hypertension. *Frontiers in*  
755 *cardiovascular medicine*. 2023;10:1163900. doi: [10.3389/fcvm.2023.1163900](https://doi.org/10.3389/fcvm.2023.1163900).
- 756 34. Gaggini M, Gorini F, Vassalle C. Lipids in atherosclerosis: Pathophysiology  
757 and the role of calculated lipid indices in assessing cardiovascular risk in  
758 patients with hyperlipidemia. *International journal of molecular sciences*.  
759 2022;24:75. doi: [10.3390/ijms24010075](https://doi.org/10.3390/ijms24010075).
- 760 35. Mahdavi-Roshan M, Mozafarihashjin M, Shoaibinobarian N, Ghorbani Z,  
761 Salari A, Savarrakhsh A, Hekmatdoost A. Evaluating the use of novel  
762 atherogenicity indices and insulin resistance surrogate markers in predicting  
763 the risk of coronary artery disease: A case-control investigation with  
764 comparison to traditional biomarkers. *Lipids in health and disease*.  
765 2022;21:126. doi: [10.1186/s12944-022-01732-9](https://doi.org/10.1186/s12944-022-01732-9).
- 766 36. Vargas HO, Nunes SO, Barbosa DS, Vargas MM, Cestari A, Dodd S,  
767 Venugopal K, Maes M, Berk M, Castelli risk indexes 1 and 2 are higher in  
768 major depression but other characteristics of the metabolic syndrome are not  
769 specific to mood disorders. *Life sciences*. 2014;102:65-71. doi:  
770 [10.1016/j.lfs.2014.02.033](https://doi.org/10.1016/j.lfs.2014.02.033).
- 771 37. Deng J, Tang X, Tang R, Chen J, Guo H, Zhou Q, Zhan X, Long H, Peng F,  
772 Wang X, Wen Y, Feng X, Su N, Tian N, Wu X, Xu Q. Atherogenic index  
773 predicts all-cause and cardiovascular mortality in incident peritoneal dialysis

- 774 patients. *Atherosclerosis*. 2023;387:117389. doi:  
775 [10.1016/j.atherosclerosis.2023.117389](https://doi.org/10.1016/j.atherosclerosis.2023.117389).
- 776 38. Oesterle A, Laufs U, Liao JK. Pleiotropic effects of statins on the  
777 cardiovascular system. *Circulation research*. 2017;120:229-243. doi:  
778 [10.1161/CIRCRESAHA.116.308537](https://doi.org/10.1161/CIRCRESAHA.116.308537).
- 779 39. Tian T, Song C, Jiang L, Dai J, Lin Y, Xu X, Yu C, Ge Z, Ding Y, Wen Y, Liu  
780 B, Shao Y, Shi P, Zhu C, Liu Y, Jing S, Wang Z, Hu Z, Li J. Hepatitis b virus  
781 infection and the risk of cancer among the chinese population. *International*  
782 *journal of cancer*. 2020;147:3075-3084. doi: [10.1002/ijc.33130](https://doi.org/10.1002/ijc.33130).
- 783 40. Motamed-Gorji N, Egtesad S, Sharafkhah M, Masoudi S, Darvishian M,  
784 Eslami L, Gharavi A, Khoshnia M, Roshandel G, Shayanrad A, Hariri S,  
785 Merat S, Poustchi H, Malekzadeh R. All-cause and cause-specific mortality in  
786 middle-aged individuals with positive hbsag: Findings from a prospective  
787 cohort study. *Archives of Iranian medicine*. 2022;25:139-147. doi:  
788 [10.34172/aim.2022.24](https://doi.org/10.34172/aim.2022.24).
- 789 41. Cheng YM, Hsieh TH, Wang CC, Kao JH. Impact of hbv infection on clinical  
790 outcomes in patients with metabolic dysfunction-associated fatty liver disease.  
791 *JHEP reports : innovation in hepatology*. 2023;5:100836. doi:  
792 [10.1016/j.jhepr.2023.100836](https://doi.org/10.1016/j.jhepr.2023.100836).
- 793 42. Khawaja T, Linge J, Leinhard OD, Al-Kindi SG, Rajagopalan S, Khera A, de  
794 Lemos JA, Joshi P, Neeland IJ. Coronary artery calcium, hepatic steatosis, and  
795 atherosclerotic cardiovascular disease risk in patients with type 2 diabetes

796 mellitus: Results from the dallas heart study. *Progress in cardiovascular*  
797 *diseases*. 2023;78:67-73. doi: [10.1016/j.pcad.2023.03.002](https://doi.org/10.1016/j.pcad.2023.03.002). Epub 2023 Mar  
798 15.

799 43. Bauer T, Möllmann H, Weidinger F, Zeymer U, Seabra-Gomes R, Eberli F,  
800 Serruys P, Vahanian A, Silber S, Wijns W, Hochadel M, Nef HM, Hamm CW,  
801 Marco J, Gitt AK. Impact of diabetes mellitus status on coronary  
802 pathoanatomy and interventional treatment: Insights from the euro heart  
803 survey pci registry. *Catheterization and cardiovascular interventions : official*  
804 *journal of the Society for Cardiac Angiography & Interventions*.  
805 2011;78:702-709. doi: [10.1002/ccd.22939](https://doi.org/10.1002/ccd.22939).

806 44. Rana JS, Dunning A, Achenbach S, Al-Mallah M, Budoff MJ, Cademartiri F,  
807 Callister TQ, Chang HJ, Cheng VY, Chinnaiyan K, Chow BJ, Cury R, Delago  
808 A, Feuchtner G, Hadamitzky M, Hausleiter J, Kaufmann P, Karlsberg RP, Kim  
809 YJ, Leipsic J, Labounty TM, Lin FY, Maffei E, Raff G, Villines TC, Shaw LJ,  
810 Berman DS, Min JK. Differences in prevalence, extent, severity, and prognosis  
811 of coronary artery disease among patients with and without diabetes  
812 undergoing coronary computed tomography angiography: Results from 10,110  
813 individuals from the confirm (coronary ct angiography evaluation for clinical  
814 outcomes): An international multicenter registry. *Diabetes care*.  
815 2012;35:1787-1794. doi: [10.2337/dc11-2403](https://doi.org/10.2337/dc11-2403).

816 45. Scicali R, Giral P, Gallo A, Di Pino A, Rabuazzo AM, Purrello F, Cluzel P,  
817 Redheuil A, Bruckert E, Rosenbaum D. Hba1c increase is associated with

- 818 higher coronary and peripheral atherosclerotic burden in non diabetic patients.
- 819 *Atherosclerosis*. 2016;255:102-108. doi:  
820 [10.1016/j.atherosclerosis.2016.11.003](https://doi.org/10.1016/j.atherosclerosis.2016.11.003).
- 821 46. Maiorino MI, Longo M, Scappaticcio L, Bellastella G, Chiodini P, Esposito K,  
822 Giugliano D. Improvement of glycemic control and reduction of major  
823 cardiovascular events in 18 cardiovascular outcome trials: An updated  
824 meta-regression. *Cardiovascular diabetology*. 2021;20:210. doi:  
825 [10.1186/s12933-021-01401-8](https://doi.org/10.1186/s12933-021-01401-8).
- 826 47. Fralick M, Colacci M, Odutayo A, Siemieniuk R, Glynn RJ. Lowering of  
827 hemoglobin a1c and risk of cardiovascular outcomes and all-cause mortality, a  
828 meta-regression analysis. *Journal of diabetes and its complications*.  
829 2020;34:107704. doi: [10.1016/j.jdiacomp.2020.107704](https://doi.org/10.1016/j.jdiacomp.2020.107704).
- 830 48. Wan EYF, Yu EYT, Mak IL, Youn HM, Chan KS, Chan EWY, Wong ICK,  
831 Lam CLK. Diabetes with poor-control hba1c is cardiovascular disease 'risk  
832 equivalent' for mortality: Uk biobank and hong kong population-based cohort  
833 study. *BMJ open diabetes research & care*. 2023;11. doi:  
834 [10.1136/bmjdr-2022-003075](https://doi.org/10.1136/bmjdr-2022-003075).
- 835 49. Vell MS, Loomba R, Krishnan A, Wangensteen KJ, Trebicka J, Creasy KT,  
836 Trautwein C, Scorletti E, Seeling KS, Hehl L, Rendel MD, Zandvakili I, Li T,  
837 Chen J, Vujkovic M, Alqahtani S, Rader DJ, Schneider KM, Schneider CV.  
838 Association of statin use with risk of liver disease, hepatocellular carcinoma,  
839 and liver-related mortality. *JAMA network open*. 2023;6:e2320222. doi:

- 840 [10.1001/jamanetworkopen.2023.20222](https://doi.org/10.1001/jamanetworkopen.2023.20222).
- 841 50. Yun B, Ahn SH, Yoon JH, Kim BK. Statin use and risk of progression to liver  
842 cirrhosis in chronic hepatitis b independent of conventional risk factors: A  
843 nationwide study. *Hepatology communications*. 2022;6:2455-2464. doi:  
844 [10.1002/hep4.2022](https://doi.org/10.1002/hep4.2022).
- 845 51. Hsiang JC, Wong GL, Tse YK, Wong VW, Yip TC, Chan HL. Statin and the  
846 risk of hepatocellular carcinoma and death in a hospital-based hepatitis  
847 b-infected population: A propensity score landmark analysis. *Journal of*  
848 *hepatology*. 2015;63:1190-1197. doi: [10.1016/j.jhep.2015.07.009](https://doi.org/10.1016/j.jhep.2015.07.009).
- 849 52. Singh S, Singh PP, Singh AG, Murad MH, Sanchez W. Statins are asso-  
850 -ciated with a reduced risk of hepatocellular cancer: A systematic review  
851 and meta-analysis. *Gastroenterology*. 2013;144:323-332. doi: [10.1053/j.gas](https://doi.org/10.1053/j.gastro.2012.10.005)  
852 [tro.2012.10.005](https://doi.org/10.1053/j.gastro.2012.10.005).
- 853 53. Cheung KS, Mak LY, Lam LK, Fung J, Liu F, Seto WK, Yuen MF. Statins  
854 associate with better clinical outcomes in chronic hepatitis b patients with  
855 hbsag seroclearance. *Hepatology international*. 2021;15:881-891. doi:  
856 [10.1007/s12072-021-10197-4](https://doi.org/10.1007/s12072-021-10197-4).
- 857 54. van de Klundert M, Ringelhan M, Protzer U. Statins suppress hepatitis b virus  
858 replication and reduce hepatoma cell viability by interfering with rho-gtpases.  
859 *Journal of hepatology*. 2018;68:S782. doi: [10.1016/S0168-8278\(18\)31833-6](https://doi.org/10.1016/S0168-8278(18)31833-6)
- 860 55. Guan L, Li L, Zou Y, Zhong J, Qiu L. Association between fib-4, all-cause  
861 mortality, cardiovascular mortality, and cardiovascular disease risk among



- 862 diabetic individuals: Nhanes 1999-2008. *Frontiers in cardiovascular medicine*.  
863 2023;10:1172178. doi: [10.3389/fcvm.2023.1172178](https://doi.org/10.3389/fcvm.2023.1172178).
- 864 56. Seo YG, Polyzos SA, Park KH, Mantzoros CS. Fibrosis-4 index predicts  
865 long-term all-cause, cardiovascular and liver-related mortality in the adult  
866 korean population. *Clinical gastroenterology and hepatology : the official  
867 clinical practice journal of the American Gastroenterological Association*.  
868 2023;21:3322-3335. doi: [10.1016/j.cgh.2023.04.026](https://doi.org/10.1016/j.cgh.2023.04.026).
- 869 57. Roca-Fernandez A, Banerjee R, Thomaidis-Brears H, Telford A, Sanyal A,  
870 Neubauer S, Nichols TE, Raman B, McCracken C, Petersen SE, Ntusi NA,  
871 Cuthbertson DJ, Lai M, Dennis A, Banerjee A. Liver disease is a significant  
872 risk factor for cardiovascular outcomes - a uk biobank study. *Journal of  
873 hepatology*. 2023;79:1085-1095. doi: [10.1016/j.jhep.2023.05.046](https://doi.org/10.1016/j.jhep.2023.05.046).
- 874 58. Schonmann Y, Yeshua H, Bentov I, Zelber-Sagi S. Liver fibrosis marker is an  
875 independent predictor of cardiovascular morbidity and mortality in the general  
876 population. *Digestive and liver disease : official journal of the Italian Society  
877 of Gastroenterology and the Italian Association for the Study of the Liver*.  
878 2021;53:79-85. doi: [10.1016/j.dld.2020.10.014](https://doi.org/10.1016/j.dld.2020.10.014). Epub 2020 Nov 2.
- 879 59. Chun HS, Lee JS, Kim BK, Lee HW, Lee YH, Kim YD, Kim SU, Park JY,  
880 Kim DY, Ahn SH. Association between the severity of liver fibrosis and  
881 cardiovascular outcomes in patients with type 2 diabetes. *Journal of  
882 gastroenterology and hepatology*. 2021;36:1703-1713. doi:  
883 [10.1111/jgh.15387](https://doi.org/10.1111/jgh.15387).

- 884 60. Yi M, Peng W, Teng F, Kong Q, Chen Z. The role of noninvasive scoring  
885 systems for predicting cardiovascular disease risk in patients with  
886 nonalcoholic fatty liver disease: A systematic review and meta-analysis.  
887 *European journal of gastroenterology & hepatology*. 2022;34:1277-1284. doi:  
888 [10.1097/MEG.0000000000002462](https://doi.org/10.1097/MEG.0000000000002462).
- 889 61. Al-Karaghoul M, Fuentes S, Davyduke T, Ma M, Abraldes JG. Impact of  
890 statin treatment on non-invasive tests based predictions of fibrosis in a referral  
891 pathway for nafld. *BMJ open gastroenterology*. 2022;9:e000798. doi:  
892 [10.1136/bmjgast-2021-000798](https://doi.org/10.1136/bmjgast-2021-000798).
- 893 62. Simon TG, Bonilla H, Yan P, Chung RT, Butt AA. Atorvastatin and fluvastatin  
894 are associated with dose-dependent reductions in cirrhosis and hepatocellular  
895 carcinoma, among patients with hepatitis c virus: Results from erchives.  
896 *Hepatology (Baltimore, Md.)*. 2016;64:47-57. doi: [10.1002/hep.28506](https://doi.org/10.1002/hep.28506).
- 897 63. Mohanty A, Tate JP, Garcia-Tsao G. Statins are associated with a decreased  
898 risk of decompensation and death in veterans with hepatitis c-related  
899 compensated cirrhosis. *Gastroenterology*. 2016;150:430-440.e431.doi:  
900 [10.1053/j.gastro.2015.10.007](https://doi.org/10.1053/j.gastro.2015.10.007).
- 901 64. Butt AA, Yan P, Bonilla H, Abou-Samra AB, Shaikh OS, Simon TG, Chung  
902 RT, Rogal SS. Effect of addition of statins to antiviral therapy in hepatitis c  
903 virus-infected persons: Results from erchives. *Hepatology (Baltimore, Md.)*.  
904 2015;62:365-374. doi: [10.1002/hep.27835](https://doi.org/10.1002/hep.27835).
- 905 65. Yousaf H, Khan MIU, Ali I, Munir MU, Lee KY. Emerging role of

- 906           macrophages in non-infectious diseases: An update. *Biomedicine &*  
907           *pharmacotherapy = Biomedecine & pharmacotherapie*. 2023;161:114426.[doi:](#)  
908           [10.1016/j.biopha.2023.114426](https://doi.org/10.1016/j.biopha.2023.114426).
- 909   66.    Cho S, Ying F, Sweeney G. Sterile inflammation and the nlrp3 inflammasome  
910           in cardiometabolic disease. *Biomedical journal*. 2023;46:100624. [doi:](#)  
911           [10.1016/j.bj.2023.100624](https://doi.org/10.1016/j.bj.2023.100624).
- 912   67.    Zinellu A, Paliogiannis P. Blood cell count derived inflammation indexes in  
913           patients with idiopathic pulmonary fibrosis. *Lung*. 2020;198:821-827. [doi:](#)  
914           [10.1007/s00408-020-00386-7](https://doi.org/10.1007/s00408-020-00386-7).
- 915   68.    Kong F, Huang J, Xu C, Huang T, Wen G, Cheng W. System inflammation  
916           response index: A novel inflammatory indicator to predict all-cause and  
917           cardiovascular disease mortality in the obese population. *Diabetology &*  
918           *metabolic syndrome*. 2023;15:195. [doi: 10.1186/s13098-023-01178-8](#).
- 919   69.    Wang P, Guo X, Zhou Y, Li Z, Yu S, Sun Y, Hua Y. Monocyte-to-high-density  
920           lipoprotein ratio and systemic inflammation response index are associated  
921           with the risk of metabolic disorders and cardiovascular diseases in general  
922           rural population. *Frontiers in endocrinology*. 2022;13:944991. [doi:](#)  
923           [10.3389/fendo.2022.944991](https://doi.org/10.3389/fendo.2022.944991).
- 924   70.    Li T, Wang P, Wang X, Liu Z, Zhang Z, Zhang Y, Wang Z, Feng Y, Wang Q,  
925           Guo X, Tang X, Xu J, Song Y, Chen Y, Xu N, Yao Y, Liu R, Zhu P, Han Y,  
926           Yuan J. Prognostic significance of inflammation in patients with coronary  
927           artery disease at low residual inflammatory risk. *iScience*. 2023;26:108060.

928 [doi: 10.1016/j.isci.2023.108060](https://doi.org/10.1016/j.isci.2023.108060).

929 71. Ye Z, Hu T, Wang J, Xiao R, Liao X, Liu M, Sun Z. Systemic  
930 immune-inflammation index as a potential biomarker of cardiovascular  
931 diseases: A systematic review and meta-analysis. *Frontiers in cardiovascular*  
932 *medicine*. 2022;9:933913. [doi: 10.3389/fcvm.2022.933913](https://doi.org/10.3389/fcvm.2022.933913).

933 72. Ma J, Li K. Systemic immune-inflammation index is associated with coronary  
934 heart disease: A cross-sectional study of nhanes 2009-2018. *Frontiers in*  
935 *cardiovascular medicine*. 2023;10:1199433. [doi: 10.3389/fcvm.2023.1199433](https://doi.org/10.3389/fcvm.2023.1199433).

936 73. Zhao Z, Zhang X, Sun T, Huang X, Ma M, Yang S, Zhou Y. Prognostic value  
937 of systemic immune-inflammation index in cad patients: Systematic review  
938 and meta-analyses. *European journal of clinical investigation*.  
939 2024;54:e14100. [doi: 10.1111/eci.14100](https://doi.org/10.1111/eci.14100).

940 74. Rabiee Rad M, Ghasempour Dabaghi G, Darouei B, Amani-Beni R. The  
941 association of atherogenic index of plasma with cardiovascular outcomes in  
942 patients with coronary artery disease: a systematic review and meta-analysis.  
943 *Cardiovascular diabetology*. 2024;23:119. [doi: 10.1186/s12933-024-02198-y](https://doi.org/10.1186/s12933-024-02198-y).

944 75. Min Q, Wu Z, Yao J, Wang S, Duan L, Liu S, Zhang M, Luo Y, Ye D, Huang Y,  
945 Chen L, Xu K, Zhou J. Association between atherogenic index of plasma  
946 control level and incident cardiovascular disease in middle-aged and elderly  
947 chinese individuals with abnormal glucose metabolism. *Cardiovascular*  
948 *diabetology*. 2024;23:54. [doi: 10.1186/s12933-024-02144-y](https://doi.org/10.1186/s12933-024-02144-y).

949 76. Wang Y, Wang S, Sun S, Li F, Zhao W, Yang H, Wu X. The predictive value of

950 atherogenic index of plasma for cardiovascular outcomes in patients with  
951 acute coronary syndrome undergoing percutaneous coronary intervention with  
952 ldl-c below 1.8mmol/l. *Cardiovascular diabetology*. 2023;22:150. doi:  
953 [10.1186/s12933-023-01888-3](https://doi.org/10.1186/s12933-023-01888-3).

954 77. Fernández-Macías JC, Ochoa-Martínez AC, Varela-Silva JA,  
955 Pérez-Maldonado IN. Atherogenic index of plasma: Novel predictive  
956 biomarker for cardiovascular illnesses. *Archives of medical research*.  
957 2019;50:285-294. doi: [10.1016/j.arcmed.2019.08.009](https://doi.org/10.1016/j.arcmed.2019.08.009).

958

## 959 **Figure legends**

960 **Figure 1** Flow diagram of cohort selection. Consequently, a final sample size of 496  
961 participants was included in the study. The patients were categorized into two groups  
962 according to their surface antigen status: patients with coexisting CVD and HBV (n =  
963 225) and patients with CVD alone (n = 271). CVD, cardiovascular disease; HBV,  
964 hepatitis B virus; HBsAg, hepatitis B surface antigen.

965 **Figure 2** The impact of HBV infection, stratified by statins use, on multiple clinical  
966 outcomes among CVD patients. OR, odds ratio; CDH, coronary heart disease; MI,  
967 myocardial infarction; AP, angina pectoris; DM, diabetes mellitus; CCU, coronary  
968 care unit; AMI, acute myocardial infarction; UAP, unstable angina pectoris; HF, heart  
969 failure.

970 **Figure 3** The impact of HBV infection, stratified by DM, on multiple clinical  
971 outcomes among CVD patients. OR, odds ratio; CDH, coronary heart disease; MI,

972 myocardial infarction; AP, angina pectoris; DM, diabetes mellitus; CCU, coronary  
973 care unit; AMI, acute myocardial infarction; UAP, unstable angina pectoris; HF, heart  
974 failure.

975 **Figure 4** The impact of DM, stratified by statins use, on multiple clinical outcomes  
976 among CVD patients. OR, odds ratio; CDH, coronary heart disease; MI, myocardial  
977 infarction; AP, angina pectoris; DM, diabetes mellitus; CCU, coronary care unit; AMI,  
978 acute myocardial infarction; UAP, unstable angina pectoris; HF, heart failure.

979 **Figure 5** The impact of HbA1c ( $\geq 6\%$  or  $< 6\%$ ), stratified by statins use, on multiple  
980 clinical outcomes among CVD patients. OR, odds ratio; CDH, coronary heart disease;  
981 MI, myocardial infarction; AP, angina pectoris; DM, diabetes mellitus; CCU, coronary  
982 care unit; AMI, acute myocardial infarction; UAP, unstable angina pectoris; HF, heart  
983 failure.

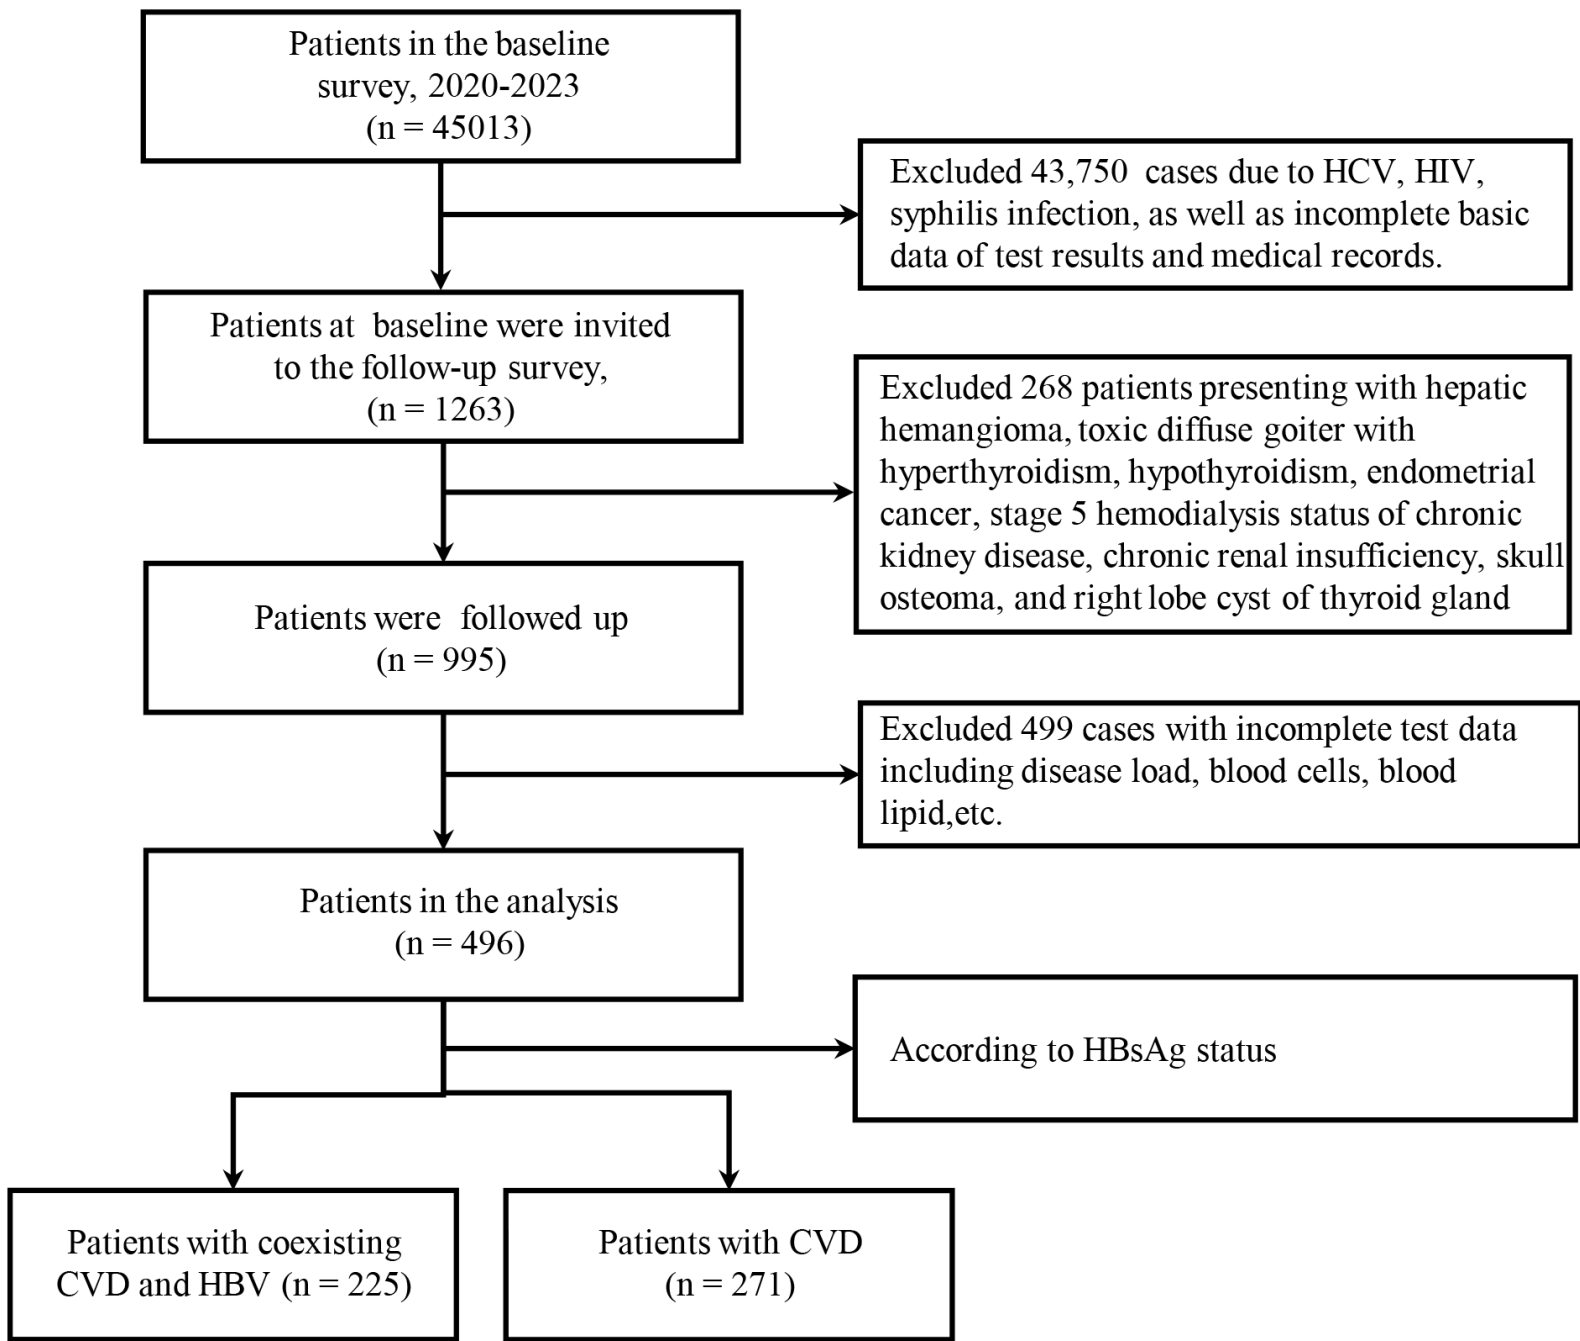

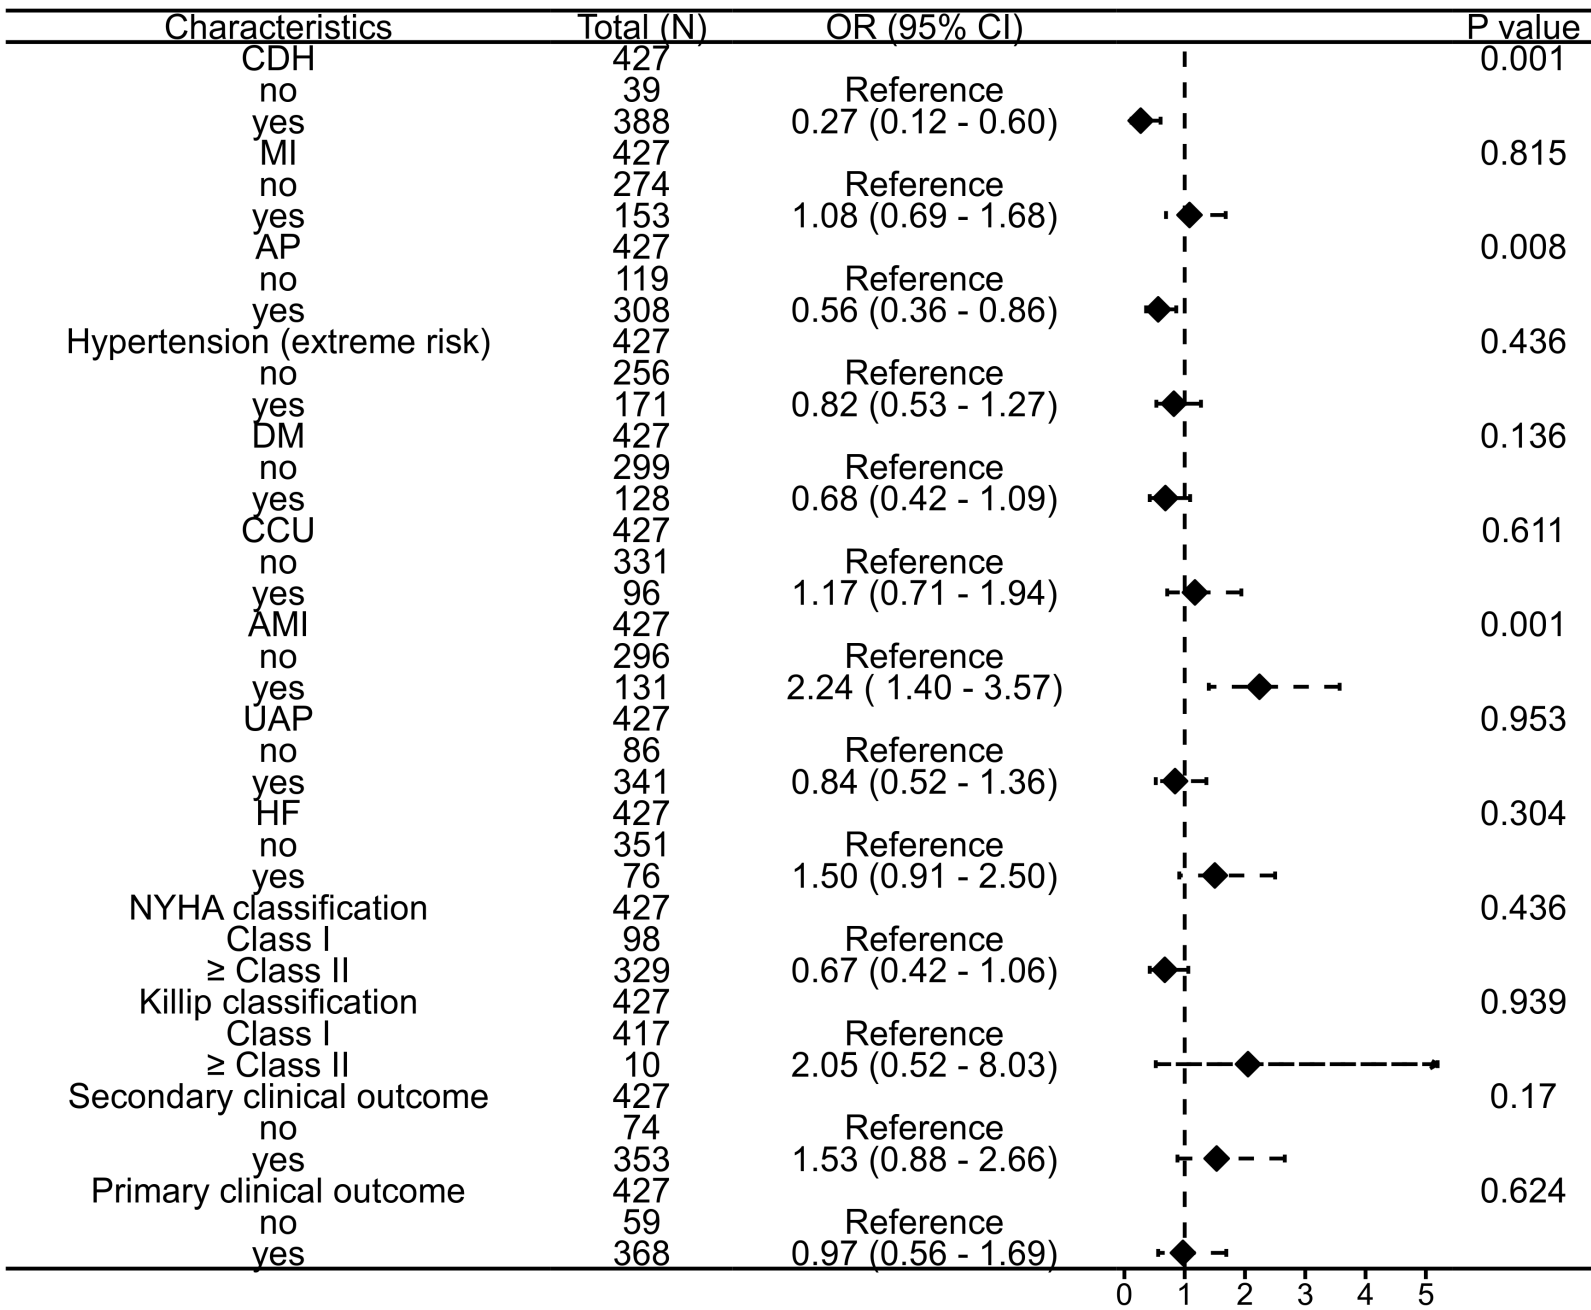



| Characteristics                     | Total (N) | OR (95% CI)        | P value |
|-------------------------------------|-----------|--------------------|---------|
| CDH                                 | 496       |                    | 0.004   |
| no                                  | 45        | Reference          |         |
| yes                                 | 451       | 0.32 (0.15 - 0.68) |         |
| MI (non-DM)                         | 223       |                    | 0.384   |
| no                                  | 164       | Reference          |         |
| yes                                 | 59        | 0.76 (0.42 - 1.40) |         |
| MI (DM)                             | 273       |                    | 0.002   |
| no                                  | 154       | Reference          |         |
| yes                                 | 119       | 2.12 (1.30 - 3.45) |         |
| AP                                  | 496       |                    | 0.084   |
| no                                  | 137       | Reference          |         |
| yes                                 | 359       | 0.68 (0.45 - 1.03) |         |
| Hypertension (extreme risk)         | 496       |                    | 0.828   |
| no                                  | 299       | Reference          |         |
| yes                                 | 197       | 0.94 (0.65 - 1.37) |         |
| CCU                                 | 496       |                    | 0.497   |
| no                                  | 396       | Reference          |         |
| yes                                 | 100       | 1.20 (0.77 - 1.87) |         |
| AMI (non-DM)                        | 223       |                    | 0.396   |
| no                                  | 138       | Reference          |         |
| yes                                 | 85        | 0.79 (0.45 - 1.37) |         |
| AMI (DM)                            | 273       |                    | < 0.001 |
| no                                  | 200       | Reference          |         |
| yes                                 | 73        | 5.37 (2.91 - 9.92) |         |
| UAP                                 | 496       |                    | 0.412   |
| no                                  | 99        | Reference          |         |
| yes                                 | 397       | 0.81 (0.51 - 1.27) |         |
| HF (non-DM)                         | 223       |                    | 0.519   |
| no                                  | 175       | Reference          |         |
| yes                                 | 48        | 0.81 (0.42 - 1.55) |         |
| HF (DM)                             | 273       |                    | 0.005   |
| no                                  | 227       | Reference          |         |
| yes                                 | 46        | 2.58 (1.32 - 5.04) |         |
| NYHA classification                 | 496       |                    | 0.468   |
| Class I                             | 108       | Reference          |         |
| ≥ Class II                          | 388       | 0.83 (0.54 - 1.28) |         |
| Killip classification               | 496       |                    | 0.243   |
| Class I                             | 485       | Reference          |         |
| ≥ Class II                          | 11        | 2.25 (0.59 - 8.59) |         |
| Secondary clinical outcome (non-DM) | 223       |                    | 0.981   |
| no                                  | 37        | Reference          |         |
| yes                                 | 186       | 1.01 (0.49 - 2.09) |         |
| Secondary clinical outcome (DM)     | 273       |                    | < 0.001 |
| no                                  | 47        | Reference          |         |
| yes                                 | 226       | 4.34 (2.06 - 9.15) |         |
| Primary clinical outcome            | 496       |                    | 0.847   |
| no                                  | 65        | Reference          |         |
| yes                                 | 431       | 0.91 (0.53 - 1.56) |         |

0.0 2.5 5.0 7.5 10.0

| Characteristics             | Total (N) | OR (95% CI)        | P value |
|-----------------------------|-----------|--------------------|---------|
| CDH                         | 494       |                    | < 0.001 |
| no                          | 44        | Reference          |         |
| yes                         | 450       | 6.9 (3.2 - 14.9)   |         |
| MI                          | 494       |                    | < 0.001 |
| no                          | 316       | Reference          |         |
| yes                         | 178       | 2.2 (1.5 - 3.2)    |         |
| AP (no statins use)         | 79        |                    | 0.01    |
| no                          | 34        | Reference          |         |
| yes                         | 45        | 3.5 (1.3 - 9.3)    |         |
| AP (atorvastatin 20 mg)     | 225       |                    | 0.063   |
| no                          | 51        | Reference          |         |
| yes                         | 174       | 1.8 (1.0 - 3.4)    |         |
| AP (rosuvastatin 10 mg)     | 190       |                    | 0.669   |
| no                          | 51        | Reference          |         |
| yes                         | 139       | 0.87 (0.46 - 1.65) |         |
| Hypertension (extreme risk) | 494       |                    | < 0.001 |
| no                          | 297       | Reference          |         |
| yes                         | 197       | 2.9 (2.0 - 4.2)    |         |
| CCU                         | 494       |                    | 0.554   |
| no                          | 394       | Reference          |         |
| yes                         | 100       | 1.2 (0.7 - 1.9)    |         |
| AMI                         | 494       |                    | 0.006   |
| no                          | 337       | Reference          |         |
| yes                         | 157       | 0.57 (0.39 - 0.84) |         |
| UAP                         | 494       |                    | 0.059   |
| no                          | 99        | Reference          |         |
| yes                         | 395       | 0.63 (0.39 - 0.99) |         |
| HF                          | 494       |                    | 0.166   |
| no                          | 403       | Reference          |         |
| yes                         | 93        | 0.70 (0.45 - 1.11) |         |
| NYHA classification         | 494       |                    | 0.879   |
| Class I                     | 108       | Reference          |         |
| ≥ Class II                  | 386       | 1.1 (0.7 - 1.6)    |         |
| Killip classification       | 494       |                    | 0.195   |
| Class I                     | 483       | Reference          |         |
| ≥ Class II                  | 11        | 3.3 (0.7 - 15.7)   |         |
| Secondary clinical outcome  | 494       |                    | 0.787   |
| no                          | 84        | Reference          |         |
| yes                         | 410       | 0.91 (0.57 - 1.46) |         |
| Primary clinical outcome    | 494       |                    | 0.208   |
| no                          | 65        | Reference          |         |
| yes                         | 429       | 0.68 (0.40 - 1.17) |         |

| Characteristics             | Total (N) | OR (95% CI)        | P value |
|-----------------------------|-----------|--------------------|---------|
| CDH (no statins use)        | 76        |                    | < 0.001 |
| no                          | 14        | Reference          |         |
| yes                         | 62        | 34.4 (4.2 - 283.6) |         |
| CDH (atorvastatin 20 mg)    | 218       |                    | 0.085   |
| no                          | 19        | Reference          |         |
| yes                         | 199       | 2.3 (0.9 - 5.9)    |         |
| CDH (rosuvastatin 10 mg)    | 186       |                    | 1       |
| no                          | 8         | Reference          |         |
| yes                         | 178       | 1.2 (0.3 - 5.1)    |         |
| MI                          | 480       |                    | 0.024   |
| no                          | 305       | Reference          |         |
| yes                         | 175       | 1.6 (1.1 - 2.3)    |         |
| AP (no statins use)         | 76        |                    | 0.019   |
| no                          | 33        | Reference          |         |
| yes                         | 43        | 3.1 (1.2 - 8.1)    |         |
| AP (atorvastatin 20 mg)     | 218       |                    | 0.09    |
| no                          | 48        | Reference          |         |
| yes                         | 170       | 1.7 (0.9 - 3.3)    |         |
| AP (rosuvastatin 10 mg)     | 186       |                    | 0.004   |
| no                          | 50        | Reference          |         |
| yes                         | 136       | 0.37 (0.18 - 0.74) |         |
| Hypertension (extreme risk) | 480       |                    | < 0.001 |
| no                          | 288       | Reference          |         |
| yes                         | 192       | 2.7 (1.9 - 4.1)    |         |
| CCU                         | 480       |                    | 0.341   |
| no                          | 381       | Reference          |         |
| yes                         | 99        | 1.3 (0.8 - 2.1)    |         |
| AMI                         | 480       |                    | 0.903   |
| no                          | 329       | Reference          |         |
| yes                         | 151       | 0.96 (0.65 - 1.41) |         |
| UAP                         | 480       |                    | 0.205   |
| no                          | 95        | Reference          |         |
| yes                         | 385       | 0.72 (0.45 - 1.15) |         |
| HF                          | 480       |                    | 0.48    |
| no                          | 392       | Reference          |         |
| yes                         | 88        | 0.82 (0.51 - 1.31) |         |
| NYHA classification         | 480       |                    | 0.408   |
| Class I                     | 105       | Reference          |         |
| ≥ Class II                  | 375       | 0.81 (0.52 - 1.26) |         |
| Killip classification       | 480       |                    | 0.066   |
| Class I                     | 469       | Reference          |         |
| ≥ Class II                  | 11        | 6.9 (0.9 - 53.2)   |         |
| Secondary clinical outcome  | 480       |                    | 0.222   |
| no                          | 82        | Reference          |         |
| yes                         | 398       | 0.71 (0.43 - 1.17) |         |
| Primary clinical outcome    | 480       |                    | 0.689   |
| no                          | 62        | Reference          |         |
| yes                         | 418       | 0.86 (0.50 - 1.49) |         |

**Table 1. Baseline characteristics of CVD with HBV and CVD alone participants.**

| Indices                         | CVD               | HBV+CVD           | $t/\chi^2$ | P-value |
|---------------------------------|-------------------|-------------------|------------|---------|
| N                               | 225               | 271               | 0.333      |         |
| age (years, mean $\pm$ SD)      | 60.21 $\pm$ 10.41 | 59.90 $\pm$ 10.18 |            | 0.739   |
| Gender                          |                   |                   | 4.463      | 0.035   |
| Female [n (%)]                  | 66(29.3%)         | 104(38.4%)        |            |         |
| Male [n (%)]                    | 159(70.7%)        | 167(61.6%)        |            |         |
| Hypertension [n (%)]            |                   |                   | 0.328      | 0.567   |
| No                              | 75(33.3%)         | 97(35.8%)         |            |         |
| Yes                             | 150(66.7%)        | 174(64.2%)        |            |         |
| DM [n (%)]                      |                   |                   | 9.679      | 0.002   |
| No                              | 84(37.3%)         | 139(51.3%)        |            |         |
| Yes                             | 141(62.7%)        | 132(48.7%)        |            |         |
| Smoking history [n (%)]         |                   |                   | 0.656      | 0.418   |
| No                              | 145(64.4%)        | 184(67.9%)        |            |         |
| Yes                             | 80(35.5%)         | 87(32.1%)         |            |         |
| Drinking history [n (%)]        |                   |                   | 0.562      | 0.453   |
| No                              | 188(83.6%)        | 233(86.0%)        |            |         |
| Yes                             | 37(16.4%)         | 38(14.0%)         |            |         |
| Height (cm)                     | 167.00 $\pm$ 7.19 | 165.00 $\pm$ 8.42 | 1.900      | 0.058   |
| Weight (kg)                     | 70.42 $\pm$ 10.46 | 68.25 $\pm$ 12.23 | 2.038      | 0.042   |
| BMI (kg/m <sup>2</sup> )        | 25.23 $\pm$ 3.22  | 24.68 $\pm$ 3.76  | 1.66       | 0.098   |
| Inpatient days (day)            | 3.70 $\pm$ 1.68   | 4.12 $\pm$ 2.91   | -1.910     | 0.057   |
| Pre-hospital medication [n (%)] |                   |                   | 69.551     | 0.000   |
| No                              | 2(0.9%)           | 77(28.4%)         |            |         |
| Yes                             | 223(99.1%)        | 194(71.6%)        |            |         |
| Statin use [n (%)]              |                   |                   | 11.102     | 0.011   |
| No                              | 2(0.9%)           | 16(5.9%)          |            |         |
| rosuvastatin                    | 88(39.1%)         | 118(43.5%)        |            |         |
| atorvastatin                    | 134(56.9%)        | 136(50.2%)        |            |         |
| simvastatin                     | 1(0.4%)           | 1(0.4%)           |            |         |
| Dosage (mg/day)                 | 16.87 $\pm$ 7.43  | 15.55 $\pm$ 6.59  | 2.037      | 0.042   |
| NYHA classification [n (%)]     |                   |                   | 0.761      | 0.383   |
| I                               | 45(20%)           | 63(23.2%)         |            |         |
| II-IV                           | 180(80%)          | 208(76.8%)        |            |         |
| Kililip classification [n (%)]  |                   |                   | 1.485      | 0.223   |
| I                               | 222(98.7%)        | 263(97.0%)        |            |         |
| II-IV                           | 3(1.3%)           | 8(3.0%)           |            |         |
| Adverse event                   |                   |                   |            |         |
| AMI [n (%)]                     |                   |                   | 14.504     | 0.000   |
| No                              | 173(76.9%)        | 165(60.9%)        |            |         |
| Yes                             | 52(23.1%)         | 106(39.1%)        |            |         |

|                            |                |                 |        |       |
|----------------------------|----------------|-----------------|--------|-------|
| UAP [n (%)]                |                |                 | 0.431  | 0.512 |
| No                         | 42(18.7%)      | 57(21%)         |        |       |
| Yes                        | 183(81.3%)     | 214(79%)        |        |       |
| HF [n (%)]                 |                |                 | 3.092  | 0.079 |
| No                         | 190(84.4%)     | 212(78.2%)      |        |       |
| Yes                        | 35(15.6%)      | 59(21.8%)       |        |       |
| LDL-C (mmol/L)             | 2.01±0.82      | 2.05±0.90       | -0.418 | 0.676 |
| TG (mmol/L)                | 1.45±0.83      | 1.26±0.75       | 2.678  | 0.008 |
| HDL-C (mmol/L)             | 0.97±0.24      | 0.96±0.24       | 0.518  | 0.605 |
| ApoA (g/L)                 | 1.13±0.18      | 1.10±0.19       | 1.879  | 0.061 |
| ApoB (g/L)                 | 0.69±0.23      | 0.68±0.22       | 0.453  | 0.651 |
| ApoE (mmol/L)              | 33.22±14.79    | 32.40±13.63     | 0.641  | 0.522 |
| Lp(a) (mg/L)               | 330.17±296.68  | 262.34±247.03   | 2.767  | 0.006 |
| TC (mmol/L)                | 3.66±1.01      | 3.54±1.00       | 1.309  | 0.191 |
| non-HDL-C (mmol/L)         | 2.68±0.94      | 2.58±0.94       | 1.094  | 0.275 |
| CYS-C (mg/L)               | 0.93±0.18      | 0.98±0.35       | -1.906 | 0.057 |
| LY (× 10 <sup>9</sup> /L)  | 1.51±0.58      | 1.55±0.58       | -0.711 | 0.478 |
| MO (× 10 <sup>9</sup> /L)  | 0.45±0.20      | 0.43±0.22       | 1.205  | 0.229 |
| NE (× 10 <sup>9</sup> /L)  | 4.72±1.76      | 4.42±1.95       | 1.794  | 0.073 |
| PLT (× 10 <sup>9</sup> /L) | 208.41 ± 59.35 | 190.94 ± 61.39  | 3.195  | 0.001 |
| NHR                        | 5.19±2.38      | 4.99±2.76       | 0.811  | 0.418 |
| MHR                        | 0.50±0.27      | 0.49±0.36       | 0.312  | 0.755 |
| NLR                        | 3.66±2.35      | 3.99±2.76       | 1.165  | 0.245 |
| PLR                        | 153.20±63.91   | 139.16±73.53    | 2.236  | 0.026 |
| THR                        | 1.63±1.22      | 1.46±1.20       | 1.542  | 0.124 |
| BNP (pg/L)                 | 477.90±928.33  | 839.05±2948.05  | -1.761 | 0.079 |
| HbA1c (%)                  | 6.49±1.24      | 6.43±1.35       | 0.453  | 0.651 |
| HBsAg (IU/mL)              | 0.00±0.00      | 208.15 ± 652.68 | -4.787 | 0.000 |
| HbsAb (mIU/mL)             | 62.44±137.92   | 3.99 ± 20.19    | 6.69   | 0.000 |
| HBeAg (S/CO)               | 0.38±0.06      | 26.58 ± 179.70  | -2.153 | 0.032 |
| HBeAb (S/CO)               | 2.41±2.86      | 7.84 ± 1.07     | 1.008  | 0.314 |
| HbcAb (S/CO)               | 2.41±2.86      | 7.84 ± 1.07     | -28.16 | 0.000 |
| ALT (U/L)                  | 29.91±19.45    | 31.33 ± 19.74   | -0.925 | 0.355 |
| AST (U/L)                  | 37.69 ± 66.37  | 41.57 ± 67.14   | -0.642 | 0.521 |
| AST/ALT                    | 1.21 ± 0.96    | 1.26 ± 1.03     | -0.548 | 0.584 |
| TBil (μmol/L)              | 14.24 ± 6.83   | 14.97 ± 6.76    | -1.164 | 0.245 |
| ALP (U/L)                  | 78.85 ± 2.94   | 84.83 ± 92.29   | -0.922 | 0.357 |

AMI, acute myocardial infarction; UAP, unstable angina pectoris; HF, heart failure;  
HbA1c, hemoglobin A1c; BNP, brain natriuretic peptide; ALT, glutamic-pyruvic  
transaminase; AST, glutamic oxalacetic transaminase; TBil, total bilirubin; ALP,

alkaline phosphatase; HBsAg, hepatitis B surface antigen; HbsAb, hepatitis B surface antibody; HBeAg, hepatitis E surface antigen; HbeAb, hepatitis E surface antibody; HbcAb, hepatitis B core antibody; TG, triglycerides; Lp(a), lipoprotein(a); PLR, platelet-to-lymphocyte ratio, PLT, platelet count; MO, Monocyte count; NE, neutrophil count; CVD, cardiovascular disease; HBV, hepatitis B virus; DM, diabetes mellitus; THR, thyroid hormone receptor; NHR, nuclear hormone receptor; MHR, monocyte-to-high-density lipoprotein-cholesterol ratio; LDL-C, low-density lipoprotein cholesterol; HDL-C, high-density lipoprotein cholesterol; ApoA, apolipoprotein A; ApoB, apolipoprotein B; ApoE, apolipoprotein E; TC, total cholesterol; no-HDL-C, non-HDL cholesterol; CYS-C, cystatin C.

**Table 2. Relationship between statin use and HBV infection**

| Statins                        | HBV infection                  |             | Total (%)  | $\chi^2$ | P-value<br>(two-sided) |
|--------------------------------|--------------------------------|-------------|------------|----------|------------------------|
|                                | negative                       | positive    |            |          |                        |
| no use (pre-admission)         | 2 (2.5%)                       | 77 (97.5%)  | 79 (100%)  | 76.835   | 0.000                  |
| atorvastatin                   | 134 (59.6%)                    | 91 (40.4%)  | 225 (100%) |          |                        |
| rosuvastatin                   | 88 (46.3%)                     | 102 (53.7%) | 190 (100%) |          |                        |
| total                          | 224                            | 270         | 494        |          |                        |
| OR (no use/atorvastatin)       | 0.018 (95% CI: 0.004 to 0.074) |             |            | 76.904   | 0.000                  |
| OR (no use/rosuvastatin)       | 0.030 (95% CI: 0.007 to 0.126) |             |            | 48.048   | 0.000                  |
| OR (atorvastatin/rosuvastatin) | 1.940 (95% CI: 1.280 to 2.940) |             |            | 9.979    | 0.002                  |

**Table 3. Relationship between statin use and quantitative parameters of HBV**

| Variables              | Statins use     | N   | P50 (P25 – P75)       | Mean ± SD | Range            |
|------------------------|-----------------|-----|-----------------------|-----------|------------------|
| HBsAg                  | No use=0        | 79  | >250 (26 to >250)     |           | <0.05 to >250    |
|                        | atorvastatin =1 | 225 | <0.05(<0.05 to 129)   |           | <0.05 to >250    |
|                        | rosuvastatin=2  | 190 | 2(<0.05 to 174)       |           | <0.05 to >250    |
|                        | measure         |     | H = 65.606            |           |                  |
|                        | P               |     | 0.000                 |           |                  |
| Median Difference(0-1) |                 |     | 70(95% CI: 26 to 125) |           |                  |
| Median Difference(0-2) |                 |     | 63(95% CI: 18 to 117) |           |                  |
| Median Difference(1-2) |                 |     | 0(95% CI: 0 to 0)     |           |                  |
| HBsAb                  | No use=0        | 73  | 0.58(0.20 to 1.45)    | 2.4±7.9   | 0 to 52          |
|                        | atorvastatin =1 | 199 | 2.10(0.58 to 20.97)   | 48±133    | 0 to 951         |
|                        | rosuvastatin=2  | 181 | 1.31(0.43 to 5.98)    | 21±57     | 0 to 338         |
|                        | measure         |     | H = 31.257            |           |                  |
|                        | P               |     | 0.000                 |           |                  |
| HBeAg                  | No use=0        | 73  | 0.34(0.31 to 0.42)    | 0.68±2.18 | 0.01 to 19       |
|                        | atorvastatin =1 | 214 | 0.39(0.34 to 0.43)    | 9±111     | 0.01 to 1617     |
|                        | rosuvastatin=2  | 186 | 0.39(0.34 to 0.43)    | 26±175    | 0.0225 to 1438   |
|                        | measure         |     | H = 8.044             |           |                  |
|                        | P               |     | 0.018                 |           |                  |
| HBeAb                  | No use=0        | 73  | 0.01(0.01 to 0.02)    | 0.20±0.48 | 0.01 to 2        |
|                        | atorvastatin =1 | 214 | 0.86(0.02 to 1.76)    | 1.17±3.07 | 0 to 43          |
|                        | rosuvastatin=2  | 186 | 0.47(0.01 to 1.74)    | 1.75±6.27 | 0.01 to 51       |
|                        | measure         |     | H = 47.239            |           |                  |
|                        | P               |     | 0.000                 |           |                  |
| HBcAb                  | No use=0        | 73  | 7.89(7.09 to 8.61)    | 7.69±1.57 | 0.06 to 10       |
|                        | atorvastatin =1 | 214 | 6.06(0.16 to 7.62)    | 4.65±3.46 | 0.04 to 11       |
|                        | rosuvastatin=2  | 186 | 7.02(0.62 to 8.04)    | 5.26±3.53 | 0.03 to 11       |
|                        | measure         |     | H = 47.295            |           |                  |
|                        | P               |     | 0.000                 |           |                  |
| HBV DNA                | No use=0        | 42  | 129(<100 to 2103)     |           | <10 to 11800000  |
|                        | atorvastatin =1 | 121 | <100(<100 to <100)    |           | <10 to 1310000   |
|                        | rosuvastatin=2  | 111 | <100(<100 to <100)    |           | <10 to 476000000 |
|                        | measure         |     | H = 5.522             |           |                  |



|  |   |  |       |  |  |
|--|---|--|-------|--|--|
|  | P |  | 0.063 |  |  |
|--|---|--|-------|--|--|

**Table 4. Relationship between statin dose and HbsAg quantification.**

| Statins use            | HbsAg quantification |                       |               | J-T    | P (two-sided) |
|------------------------|----------------------|-----------------------|---------------|--------|---------------|
|                        | N                    | P50(P25–P75)          | Range         |        |               |
| no use (pre-admission) | 79                   | 251(26 to >250)       | <0.05 to >250 |        |               |
| atorvastatin (10 mg)   | 19                   | 78(<0.05 to >250)     | <0.05 to >250 |        |               |
| atorvastatin (20 mg)   | 182                  | <0.05 (<0.05 to 83)   | <0.05 to >250 |        |               |
| atorvastatin (40 mg)   | 19                   | <0.05 (<0.05 to >250) | <0.05 to >250 | -7.615 | 0.000         |
|                        |                      |                       |               |        |               |
| rosuvastatin (10 mg)   | 8                    | 17(<0.05 to 198)      | <0.05 to >250 |        |               |
| rosuvastatin (20 mg)   | 166                  | 1(<0.05 to 112)       | <0.05 to >250 |        |               |
| rosuvastatin (40 mg)   | 12                   | 80(<0.05 to >250)     | <0.05 to >250 | -5.936 | 0.000         |
